# Supplementary material for: A Possible Trifunctional β-Carotene Synthase Gene Identified in the Draft Genome of Aurantiochytrium sp. Strain KH105
Source: MDPI journal article supplement (doi:10.3390/genes9040200), 2018-04-09
Supplement: s1 [file s1]

|                 |   |                                                                                          |
|-----------------|---|------------------------------------------------------------------------------------------|
| KH105_crtIBY1   | 1 | -----MARRASRPVAAVVV                                                                      |
| KH105_crtIBY2   | 1 | -----MARRASRLVAAIVV                                                                      |
| Brevundimonas   | 1 | -----                                                                                    |
| Xanthophyllomyc | 1 | -----                                                                                    |
| Arabidopsis     | 1 | MVVFGN---VSAANLPYQNGFLEALS <sup>SS</sup> GGCELM <sup>GH</sup> SFRVPTSQALKTRTRRRRSTAGPLOV |
| Haematococcus   | 1 | -----MHTTMRGQAS <sup>SS</sup> SGSCTSGR-QTRGHSRRSV <sup>RR</sup> ERG-----ALRV             |
| Thalassiosira   | 1 | -----MLPHTTVHGVVALATLL <sup>LN</sup> NA                                                  |
| Ectocarpus      | 1 | MVGAGGGGAFLALALAGKTISAFVLPPATSFTGV <sup>GL</sup> SGSARQSAIR <sup>RR</sup> NGVSSMIFDFPAPG |
| Chlamydomonas   | 1 | -----MQTQVKPSS <sup>SR</sup> QANLVAKGASCPRVAVRRVAGRR-----ALEV                            |
| Synechococcus   | 1 | -----                                                                                    |
| Haliscomenobact | 1 | -----                                                                                    |
| Saprospira      | 1 | -----                                                                                    |
| Fulvivirga      | 1 | -----                                                                                    |
| Pedobacter      | 1 | -----                                                                                    |
| Cyclobacterium  | 1 | -----                                                                                    |
| Haloquadratum   | 1 | -----                                                                                    |
| Natrinema       | 1 | -----                                                                                    |

|                 |    |                                                                                                                                                         |
|-----------------|----|---------------------------------------------------------------------------------------------------------------------------------------------------------|
| KH105_crtIBY1   | 15 | VLVVVASACCWQAAADVADAQ <sup>AG</sup> ARGPGRES <sup>SD</sup> GDRAKKRI <sup>AV</sup> LGAGYAGLSAACE <sup>LS</sup> RLGH                                      |
| KH105_crtIBY2   | 15 | VLVVVAPACCRQAAADVADAQ <sup>AG</sup> ARGPGQES <sup>SD</sup> GGRAKKRI <sup>AV</sup> LGAGYAGLSAACE <sup>LS</sup> RLGH                                      |
| Brevundimonas   | 1  | -----MRAAVIGSGFGGLSLAIRLO <sup>TA</sup> GI                                                                                                              |
| Xanthophyllomyc | 1  | -----MGKEQDQDKPTAIIVGCGIGGI <sup>TA</sup> AARLAKEGF                                                                                                     |
| Arabidopsis     | 58 | V <sup>CV</sup> DIP <sup>RP</sup> EL <sup>ENT</sup> -VNFLEAASLSASFRSAP <sup>RP</sup> AK <sup>PL</sup> KVVIAGAGLAGLSTAKYLADAGH                           |
| Haematococcus   | 38 | VAKDYPT <sup>PD</sup> FQSS-DTYQEALSLSTKL <sup>RN</sup> AP <sup>RP</sup> AK <sup>PL</sup> LRVVIAGAGLAGLSAAKY <sup>LA</sup> DAGH                          |
| Thalassiosira   | 21 | FVLVDSFAPS <sup>PR</sup> CSHR <sup>YH</sup> ISSAAS <sup>TT</sup> LHATTPHSEYDAIIVGSGIGGLSAAALSHYGY                                                       |
| Ectocarpus      | 61 | ERKDYPRP <sup>PL</sup> EETSENQ <sup>RE</sup> SAAF <sup>SO</sup> AF <sup>LD</sup> MP <sup>RP</sup> ER <sup>PL</sup> KVAVIGAGLAGLS <sup>CA</sup> KYLSDAGH |
| Chlamydomonas   | 39 | VARDYPRPA <sup>FE</sup> ETA-ET <sup>FQ</sup> EAKALSSKL <sup>KD</sup> AP <sup>RP</sup> AK <sup>PL</sup> KVVIAGAGLAGLSAAKY <sup>LS</sup> DAGH             |
| Synechococcus   | 1  | -----MRVAIAGAGLAGLS <sup>CA</sup> KYLADAGH                                                                                                              |
| Haliscomenobact | 1  | -----MS-----KKVVVIGAGFAGLAAAC <sup>CL</sup> AKAGY                                                                                                       |
| Saprospira      | 1  | -----MS-----KKVIVIGSGFAGLSAAC <sup>HL</sup> AKAGY                                                                                                       |
| Fulvivirga      | 1  | -----MSK-----KKI <sup>AV</sup> IGAGFAGLSAAC <sup>CL</sup> ADAGF                                                                                         |
| Pedobacter      | 1  | -----MPVNSDHKIV <sup>PK</sup> VAVIGSGFAGLSAAAY <sup>LA</sup> AKAGC                                                                                      |
| Cyclobacterium  | 1  | -----MKP-----KEVVVIGSGFSG <sup>LS</sup> TATH <sup>LA</sup> AAGY                                                                                         |
| Haloquadratum   | 1  | -----MNTVSD <sup>LS</sup> DV <sup>DG</sup> -----SSVVVIGGGFG <sup>GL</sup> STAC <sup>YL</sup> SDAGA                                                      |
| Natrinema       | 1  | -----MOSLAG-----ESVVVIGSGIG <sup>GL</sup> STAC <sup>YL</sup> ADAGA                                                                                      |

|                 |     |                                                                                                                                               |
|-----------------|-----|-----------------------------------------------------------------------------------------------------------------------------------------------|
| KH105_crtIBY1   | 75  | E <sup>V</sup> VVLEKNDYVGGRAHQ <sup>FE</sup> VEADNGOT <sup>FK</sup> FDAGPSWYWMPE <sup>VF</sup> DRFFARYGRT-V <sup>OE</sup> FYQ                 |
| KH105_crtIBY2   | 75  | E <sup>V</sup> VVLEKNDYVGGRAHQ <sup>FE</sup> VEADNGOT <sup>FK</sup> FDAGPSWYWMPE <sup>VF</sup> DRFFARYGRT-V <sup>OE</sup> FYQ                 |
| Brevundimonas   | 25  | QTTVFE <sup>AR</sup> DLPGGRAYVYKDK-----GYTFDAGPTVITDPSALEELFEGAGRK- <sup>LS</sup> DYVE                                                        |
| Xanthophyllomyc | 34  | QTTVFEKNDYSGGRCS <sup>LI</sup> ERD-----GYRFDOGPSL <sup>LL</sup> LPDL <sup>FK</sup> QT <sup>FE</sup> DLGK-MEDWVD                               |
| Arabidopsis     | 117 | K <sup>P</sup> LLLE <sup>AR</sup> DVLGGKIAAW <sup>KD</sup> ED-----GDWYETGLHIFFG--AYPNVQNLFGELGIND <sup>RL</sup> Q                             |
| Haematococcus   | 97  | H <sup>P</sup> VVLEGRDVLGGKVAAW <sup>KD</sup> ED-----GDWYETGLHIFFG--AYPNIQNL <sup>FK</sup> ELGI <sup>OD</sup> RLQ                             |
| Thalassiosira   | 81  | S <sup>V</sup> AVFEAHSTPGGA <sup>AH</sup> GYTVNAKDVG <sup>PL</sup> T <sup>FD</sup> TGPSFFSGLNSNYPAKSSN <sup>PL</sup> RSIL <sup>DI</sup> ID    |
| Ectocarpus      | 121 | K <sup>P</sup> VVLE <sup>AR</sup> DVLGGKVAAW <sup>QD</sup> KD-----GDWVETGLHIFFG--AYPNVNQM <sup>FT</sup> ELGIR <sup>DR</sup> LQ                |
| Chlamydomonas   | 98  | H <sup>P</sup> IVLEGRDVLGGKVAAW <sup>KD</sup> ED-----GDWYETGLHIFFG--AYPNMMNV <sup>FK</sup> ELNIEER <sup>LR</sup> LQ                           |
| Synechococcus   | 25  | T <sup>P</sup> IVVLE <sup>AR</sup> DVLGGKVAAW <sup>KD</sup> ED-----GDWYETGLHIFFG--AYPNMLQ <sup>LF</sup> KELNIE <sup>DR</sup> RLQ              |
| Haliscomenobact | 27  | E <sup>V</sup> TVLEKNSVPGGRARQ <sup>YS</sup> AD-----GFVFDMGPSWYWMPE <sup>VF</sup> EQFFAHFGKK-TSDY <sup>YQ</sup>                               |
| Saprospira      | 27  | S <sup>V</sup> Q <sup>LL</sup> LEKND <sup>CA</sup> GGGRARKMEVQ-----GYHFDMGPSWYWMPE <sup>VF</sup> EQFFEQFGKK-VSDY <sup>YE</sup>                |
| Fulvivirga      | 28  | N <sup>V</sup> TVFEKNASPGGRARK <sup>FD</sup> VQ-----GFTFDMGPSWYWMPE <sup>VF</sup> ERFFNRF <sup>GK</sup> S-TSDY <sup>YT</sup>                  |
| Pedobacter      | 35  | S <sup>V</sup> DVYEKNS <sup>SI</sup> GGRARQ <sup>LK</sup> TEN-----GYLFDMGPSWYWMPE <sup>VF</sup> ERFFNDF <sup>GK</sup> YK-ASD <sup>FY</sup> YE |
| Cyclobacterium  | 28  | K <sup>V</sup> TVLEKNEVLGGRARK <sup>FN</sup> SA-----GFTFDMGPSWYWMPE <sup>VF</sup> DRY <sup>FS</sup> NFGKK-TSDY <sup>YD</sup>                  |
| Haloquadratum   | 37  | D <sup>V</sup> TVLEKNEQLGGRAS <sup>RL</sup> LEV <sup>D</sup> -----GFKFDMGPSWY <sup>LP</sup> MPDVFERFFN <sup>YF</sup> FDRE-PS <sup>EY</sup> YE |
| Natrinema       | 31  | D <sup>V</sup> RVIEKNEQLGGRAS <sup>RL</sup> E <sup>KD</sup> -----GFTFDMGPSWY <sup>LP</sup> MPDVFERFFAD <sup>FD</sup> RT-PG <sup>DY</sup> YD   |

**Supplementary Figure S3:** Alignment of CrtI1 and CrtI2 amino acids within CrtKH105\_CrtIBY1 and CrtKH105\_CrtIBY2 with those of other eukaryotes.

|                 |     |         |          |         |        |         |          |        |        |             |
|-----------------|-----|---------|----------|---------|--------|---------|----------|--------|--------|-------------|
| KH105_crtIBY1   | 134 | LERLDPA | YRIIR    | NDHNGE  | GTVDVP | GASSE   | AFMSWARQ | M----- | NGDARL | VDRLM       |
| KH105_crtIBY2   | 134 | LERLDPA | YRIIR    | NDHNGE  | GTVDVP | GASSE   | AFMSWARQ | M----- | NGDARL | VDRLM       |
| Brevundimonas   | 79  | LPLVAPF | YRLC---  | WEDGDV  | FDYVNG | QDELDR  | QIVARN   | -----  | PADKEG | YRRFLL      |
| Xanthophyllomyc | 88  | LIKCEPN | YVCH---  | FHDEET  | FFTLST | DMALLK  | REVERFEG | -----  | KDGFDR | FLSFI       |
| Arabidopsis     | 171 | WKEHSMI | FAMP---- | SKPGEFS | RFD    | FPDVL   | PAPLNGI  | -----  | WAILRN | NEMLT       |
| Haematococcus   | 151 | WKEHSMI | FAMP---- | DAPGEFS | RFD    | FPDVL   | PAPWNGI  | -----  | IAILRN | NQMLS       |
| Thalassiosira   | 141 | EKVECI  | PYTTEG-  | LMFPEG  | VFVHSS | NFGKEG  | STVEAV   | SGSNGV | QEWASL | MKSMDPLAQAV |
| Ectocarpus      | 175 | WKSHSMI | FAMPGQ   | QTADG   | QFRFS  | RFEFPAL | PAPLNGI  | -----  | VAILLN | NEMLT       |
| Chlamydomonas   | 152 | WKEHSMI | FAMP---- | DSPGEFS | RFD    | FPDVL   | IPAPFNGV | -----  | FAILRN | NQMLT       |
| Synechococcus   | 79  | WKSHSMI | FNQO---- | DEPGTYS | RFD    | FPDVL   | PAPVNGV  | -----  | AAILGN | NDMLT       |
| Haliscomenobact | 81  | LQRLDPS | YSIF---  | FGEDVM  | QVNPAN | MEELF   | FAMFERYE | -----  | PGSSRN | LKKFLL      |
| Saprospira      | 81  | LKRLDPA | YKIV---  | FGEGEEL | AVPAD  | MQALKE  | LFESEYE  | -----  | PGSSAK | LQOQFL      |
| Fulvivirga      | 82  | LQRLNPS | YKVF---  | FKDE-   | SIDIPA | ALQDI   | YALFDTIE | -----  | PGSSTN | LROQFL      |
| Pedobacter      | 90  | LELLNPG | FSIV---  | FGMEDVM | NVPAD  | FNELCA  | LFESLE   | -----  | TGSAAK | LKQFL       |
| Cyclobacterium  | 82  | LIRLDPS | YSVI---  | FGQEDVM | EIPANL | DQFKLA  | LEKLE    | -----  | PGVSEK | LDQFL       |
| Haloquadratum   | 91  | LTRLDPH | YRIF---  | FKDGD   | RVMVDP | DREQN   | REVFESYE | -----  | PGAGDR | FDEYLL      |
| Natrinema       | 85  | LEHLDPH | YRIF---  | FKDGD   | RVDITP | DLERTK  | AVFEEYE  | -----  | SGAGEA | LERYLL      |

|                 |     |          |         |         |        |        |        |        |        |        |           |           |          |
|-----------------|-----|----------|---------|---------|--------|--------|--------|--------|--------|--------|-----------|-----------|----------|
| KH105_crtIBY1   | 183 | DEAKAKYE | EGVFKW  | IWHFPM  | VSWWEM | MIDLNL | VRAALQ | YDMFNS | FV--   | AHLQKY | ISSDTLLM  |           |          |
| KH105_crtIBY2   | 183 | DEAKAKYE | EGVFKW  | IWHFPM  | VSWWEM | MIDLNL | VRAALQ | YDMFNS | FV--   | AHLQKY | ISSDTLLM  |           |          |
| Brevundimonas   | 125 | AYSQDLL  | KEGYLL  | KLGA    | VEFLD  | FAS--  | MVKAAP | ELMRLQ | AWRSVY | --     | DKVAGY    | IQDEHLRQ  |          |
| Xanthophyllomyc | 135 | QEAHRHY  | ELAVVH  | VLOKN   | FPGF   | AAFLRL | QFIGO  | ILALHP | FESI   | W--    | TRVCRY    | FKTDRLRR  |          |
| Arabidopsis     | 215 | WPEKIKF  | AIGLLP  | AMVGG   | OAYVEA | QDGLSV | KEWMEK | QGV    | PERVT  | --     | DEVFIAMS  | ----K     |          |
| Haematococcus   | 194 | WPEKIRF  | AIGLLP  | AIIFG   | QRYCEE | QDELTV | TEWMRK | QGV    | PDRVN  | --     | EEVFIAMA  | ----K     |          |
| Thalassiosira   | 200 | DAMPTLA  | LALRAD  | LGLLAST | SQFLPN | EAKLN  | PLONL  | KLTK   | PFNSNI | INEAGV | KDTFIR    | NWLDV     |          |
| Ectocarpus      | 224 | FPEKIQF  | GIGILL  | PAIFLG  | QKYVEE | CDSLTV | SQWMMK | QGV    | PDRVN  | --     | DEVFIAMA  | ----K     |          |
| Chlamydomonas   | 195 | WPEKIQF  | AIGLLP  | AIIFG   | QRYCEE | QDELTV | TEWMRK | QGV    | PDRVN  | --     | EEVFIAMA  | ----K     |          |
| Synechococcus   | 122 | WPEKISF  | GGLVPA  | MLRG    | QGYVEE | CDKYSW | TEWLR  | VHNIP  | PERVN  | --     | DEVFLAMS  | ----K     |          |
| Haliscomenobact | 127 | EEAKYKY  | EVGMAD  | FVNKPS  | HSILEF | ADLRL  | LKSMF  | RLQMF  | TSM    | S--    | THVRQL    | FNNROLIE  |          |
| Saprospira      | 127 | DEAEYKY  | KVGMGE  | FVQKPS  | LSILEF | ADLRL  | VVRAL  | FKLQ   | MFSSIA | --     | THEVEKL   | FKKPHPLRE |          |
| Fulvivirga      | 127 | EEAAYKY  | EVGINDL | VYKPG   | RSVTEF | LDMLM  | HGIFRL | HVFNS  | IA--   | NYIRKY | FFSHPKLIQ |           |          |
| Pedobacter      | 136 | KEAEFKY  | DVGMGK  | LVYKPG  | LSLEF  | ADADLI | KGMFK  | LOVFNS | FS--   | --     | KHVROFF   | FKHPOLIA  |          |
| Cyclobacterium  | 128 | EQAAFKY  | QRGIND  | LVRHRS  | VSLTEF | LDLKL  | FRDVL  | KMDIF  | QSM    | S--    | --        | KHIRKY    | FKNEKIIR |
| Haloquadratum   | 137 | AKSKKNY  | EVGMEH  | FVYED   | RAELSD | YADWD  | VMMKN  | ARGLS  | LIGSMQ | --     | DHVEQY    | FDPKLOQ   |          |
| Natrinema       | 131 | EKSQENY  | EVGMKH  | FVYED   | RERLRD | YLDLD  | VARQ   | ARGLS  | LIGSMQ | --     | GHVAGY    | FDPKLOQ   |          |

|                 |     |         |         |         |         |        |         |        |           |            |           |         |         |
|-----------------|-----|---------|---------|---------|---------|--------|---------|--------|-----------|------------|-----------|---------|---------|
| KH105_crtIBY1   | 241 | ILKWPVI | FLGAS   | PNGAPAL | YSMMTY  | GGHALG | TFYPTG  | GGLARP | VVAIAELAK | --         | DLGVDIQ   |         |         |
| KH105_crtIBY2   | 241 | ILKWPVI | FLGAS   | PNGAPAL | YSMMTY  | GGHALG | TFYPTG  | GGLARP | VVAIAELAK | --         | DLGVDIQ   |         |         |
| Brevundimonas   | 181 | AFSFS   | HLVGGN  | PFATSS  | TYALIH  | ALERRW | GVWFPR  | GGTGAL | IQAMVRLFO | --         | DLGGEIR   |         |         |
| Xanthophyllomyc | 193 | VFSFAV  | MYMGOS  | PYSAPGT | YSLLQY  | TELTEG | IWYPRG  | GFQV   | PNTLLQIV  | KRNNPSAKFN |           |         |         |
| Arabidopsis     | 268 | ALNFIN  | PDELSM  | QCILIAL | NRFLOE  | KHGS   | KMAFLD  | GNNP   | PERLCMP   | VVDHIR     | --        | SLGGEVQ |         |
| Haematococcus   | 247 | ALNFIN  | PDDLST  | TVVLTAL | NRFLOE  | QHGS   | KMAFLD  | GAP    | PERLCOP   | MPVDYFK    | --        | ARGGDL  |         |
| Thalassiosira   | 260 | LCFCLSG | VPSDGT  | ITAEMAM | MMGEFY  | DEDAIM | DCPV    | GGASAT | VDALV     | RGIE--     | --        | KKGGKV  |         |
| Ectocarpus      | 277 | ALNFID  | PENLSM  | TVVLTAL | NRFLOE  | THGS   | KMAFLD  | GPP    | PTRLCOP   | MDHML      | --        | ARGGELR |         |
| Chlamydomonas   | 248 | ALAFID  | PDRLSM  | TVVLTAL | NRFLOE  | RHGS   | KMAFLD  | GAP    | PERLCOP   | MPVDHFT    | --        | ARGGELK |         |
| Synechococcus   | 175 | ALNFID  | PDEISAT | TVVLTAL | NRFLOE  | KSGS   | KMAFLD  | GAP    | PERLCOP   | VVEHIE     | --        | SLGGEVH |         |
| Haliscomenobact | 185 | LLEFPV  | FLGATP  | AKTPAM  | YSLMNY  | ADMAL  | GTWYPR  | GGMYK  | IVEAMV    | SLAR--     | --        | ELGVDLQ |         |
| Saprospira      | 185 | LLKFPV  | FLGATP  | EETPAM  | YSLMNY  | ADLAL  | GTWFP   | MGMYQ  | IVAAMV    | SLAE--     | --        | ELGVEIL |         |
| Fulvivirga      | 185 | LLEFPV  | FLGAMP  | RKTPAL  | YSLMNY  | ADMAL  | GTWYPR  | GGMHK  | IVEAMET   | LAL--      | --        | SLGVRF  |         |
| Pedobacter      | 194 | LMEFPV  | FLGAMP  | EDTPAL  | YSLMNY  | AGLKL  | GTWYPR  | GGFAA  | VIQAMK    | TVAE--     | --        | ROGVKFH |         |
| Cyclobacterium  | 186 | LMEFPV  | FLGETA  | QNI     | PALYSLM | NYADIA | LGTWYPR | GGMHK  | IEGMV     | TLAK--     | --        | DNGVFR  |         |
| Haloquadratum   | 195 | IMQYTL  | VFLG    | GAPTNT  | TPALYN  | LM     | SHVDFN  | MGVY   | PENGV     | GGVVDG     | IVELAD--  | --      | ELGVTFH |
| Natrinema       | 189 | IMQYTL  | VFLG    | GSPTNT  | TPALYN  | LM     | SHVDFN  | LGVW   | YPDGG     | IGAVID     | GIAELGA-- | --      | ELGVEYD |

|                 |     |    |      |      |      |     |     |      |        |      |      |      |     |      |     |      |     |      |     |           |      |
|-----------------|-----|----|------|------|------|-----|-----|------|--------|------|------|------|-----|------|-----|------|-----|------|-----|-----------|------|
| KH105_crtIBY1   | 299 | LD | AEVT | SFRF | DET  | TGR | GVQ | AVCT | RND    | ---  | RCE  | AVD  | GVV | AAAD | YH  | HVE  | QTL | LPPE | LR  | ----      |      |
| KH105_crtIBY2   | 299 | LD | AEVT | SFRF | DET  | TGR | GVQ | AVCT | RND    | ---  | RCE  | AVD  | GVV | AAAD | YH  | HVE  | QTL | LPPE | DL  | ----      |      |
| Brevundimonas   | 239 | LN | SPVE | ITLA | NG   | --  | RAD | GVV  | VGG    | ---  | QAL  | AFD  | MV  | ASNA | DV  | VHT  | YQ  | RLLG | QEP | RG        | ---- |
| Xanthophyllomyc | 253 | FN | APVS | QVLL | SPA  | KDR | ATG | VRLE | SG     | ---  | EE   | HAD  | VV  | IVNA | DL  | VY   | ASE | HLI  | PDD | ARNKIGQ   |      |
| Arabidopsis     | 326 | LN | SRIK | KIEL | NDD  | GT  | VKS | FLL  | T      | ---- | NG   | STVE | GDA | YVFA | AP  | VD   | ILK | LLP  | DP  | PWK       | ---- |
| Haematococcus   | 305 | FN | SRV  | KQIV | LNDD | DK  | SVK | HL   | ALT    | ---- | NG   | QTE  | GDL | YIS  | AMP | VD   | IMK | ILM  | PD  | PWA       | ---- |
| Thalassiosira   | 318 | CN | SRI  | DEIC | IE   | NGK | AVG | VR   | LAKNYS | ---  | RI   | KAT  | KGV | IS   | NLS | VW   | DL  | MNS  | GIV | DTDL      | ---- |
| Ectocarpus      | 335 | ME | QRIS | EIL  | NDD  | KT  | VKG | LKM  | Q      | ---- | DG   | STV  | VAD | AY   | VST | MP   | VD  | ILK  | LAL | PEAWR     | ---- |
| Chlamydomonas   | 306 | MN | ARV  | KDIV | LNDD | GS  | VKH | YKL  | T      | ---- | TG   | EV   | GED | LY   | MS  | AMP  | VD  | ILK  | LLV | PDQWK     | ---- |
| Synechococcus   | 233 | LD | SPL  | REIK | LNED | GS  | VAF | HIG  | GVK    | GKDS | FD   | LTA  | DAY | VSA  | LP  | VD   | PF  | KLL  | LP  | KPWK      | ---- |
| Haliscomenobact | 243 | LN | QEV  | KQI  | LAPH | G   | --  | LAT  | KVIT   | QD   | ---- | HE   | YT  | ADA  | VV  | GG   | ADY | HH   | LDO | QVLAPEQR  | ---- |
| Saprospira      | 243 | LN | EEV  | LSI  | EV   | SGK | --  | QAK  | AAIT   | KN   | ---- | GR   | FE  | ADI  | IV  | AG   | ADY | HH   | VDQ | OKLLAPEYR | ---- |
| Fulvivirga      | 243 | YN | AAV  | SAI  | EV   | KEN | --  | HAK  | GVV    | VDN  | ---- | TL   | IE  | HD   | II  | IG   | ADY | HH   | IEQ | HLPEKYR   | ---- |
| Pedobacter      | 252 | TD | TNV  | DGLE | VQAR | --  | KLO | ALK  | LAN    | ---- | SS   | EAY  | DGL | IAA  | ADY | HH   | VES | QOLL | GP  | PAYR      | ---- |
| Cyclobacterium  | 244 | NN | AEV  | VKIM | ADDG | --  | KAK | S    | VOLL   | SG   | ---- | EE   | IA  | FIL  | VAS | ADY  | HH  | VDK  | HL  | LEPKYS    | ---- |
| Haloquadratum   | 253 | TN | APV  | SEIR | GREG | --  | AF  | VTR  | TETD   | ---  | AE   | FYS  | ESV | VSN  | ADY | HH   | TE  | MELL | PP  | PKR       | ---- |
| Natrinema       | 247 | TD | RPAT | EIK  | GRTG | --  | GFE | VET  | P      | A    | ---  | GP   | LOS | DL   | VVS | NADY | AA  | TEQ  | ELL | TPERR     | ---- |

|                 |     |     |      |      |      |     |      |       |     |     |      |       |       |       |    |       |     |     |     |      |     |      |              |                |    |    |    |              |    |              |   |    |              |   |   |   |   |   |   |   |   |   |   |   |   |   |   |   |   |   |   |   |
|-----------------|-----|-----|------|------|------|-----|------|-------|-----|-----|------|-------|-------|-------|----|-------|-----|-----|-----|------|-----|------|--------------|----------------|----|----|----|--------------|----|--------------|---|----|--------------|---|---|---|---|---|---|---|---|---|---|---|---|---|---|---|---|---|---|---|
| KH105_crtIBY1   | 351 | --  | RYE  | QGF  | WDAQ | VMS | P    | ----- | SC  | VL  | FYL  | GFD   | HRI   | QGL   | TH | HT    | TFF | FDR | DL  | DAHL | HAA | FD   | TH           |                |    |    |    |              |    |              |   |    |              |   |   |   |   |   |   |   |   |   |   |   |   |   |   |   |   |   |   |   |
| KH105_crtIBY2   | 351 | --  | RYE  | QGF  | WDAQ | VMS | P    | ----- | SC  | VL  | FYL  | GFD   | HRI   | QGL   | TH | HT    | TFF | FDR | DL  | DAHL | HAA | FD   | TH           |                |    |    |    |              |    |              |   |    |              |   |   |   |   |   |   |   |   |   |   |   |   |   |   |   |   |   |   |   |
| Brevundimonas   | 289 | --  | RKE  | GAR  | LASK | RHS | M    | ----- | SL  | FVI | YF   | GL    | KRV   | HPE   | VR | HHT   | TV  | LFG | PRY | REL  | IGE | IF   | KGP          |                |    |    |    |              |    |              |   |    |              |   |   |   |   |   |   |   |   |   |   |   |   |   |   |   |   |   |   |   |
| Xanthophyllomyc | 310 | LGE | VKRS | WWAD | LV   | GGK | KLK  | GSC   | SS  | LS  | FY   | WS    | M     | DR    | IV | DGL   | GG  | HN  | I   | FLA  | ED  | FKGS | FDTIFEEL     |                |    |    |    |              |    |              |   |    |              |   |   |   |   |   |   |   |   |   |   |   |   |   |   |   |   |   |   |   |
| Arabidopsis     | 376 | --  | EIP  | YF   | KKLD | KLV | GV   | ----- | PV  | IN  | VHI  | WF    | DR    | KL    | KN | TY    | DH  | LL  | FS  | R    | NLL | SVY  | ADMSLTC      |                |    |    |    |              |    |              |   |    |              |   |   |   |   |   |   |   |   |   |   |   |   |   |   |   |   |   |   |   |
| Haematococcus   | 355 | --  | SMP  | YF   | KQLN | G   | LEGV | ----- | PV  | IN  | IHI  | WF    | DR    | KL    | T  | -     | TV  | DH  | LL  | FS   | R   | SP   | LLSVYADMSTTC |                |    |    |    |              |    |              |   |    |              |   |   |   |   |   |   |   |   |   |   |   |   |   |   |   |   |   |   |   |
| Thalassiosira   | 370 | --- | FP   | ED   | FV   | KER | KATP | ---   | ACP | S   | F    | M     | H     | L     | V  | G     | F   | OIT | KEE | L    | SK  | LO   | AHY          | -----IFMNDWERG |    |    |    |              |    |              |   |    |              |   |   |   |   |   |   |   |   |   |   |   |   |   |   |   |   |   |   |   |
| Ectocarpus      | 385 | --- | PM   | PY   | F    | E   | KL   | N     | L   | N   | G    | V     | ----- | PV    | IN | I     | H   | M   | WF  | DR   | KL  | T    | -            | TV             | DH | LL | FS | R            | SP | LLSVYADMSTTC |   |    |              |   |   |   |   |   |   |   |   |   |   |   |   |   |   |   |   |   |   |   |
| Chlamydomonas   | 356 | --- | PN   | PY   | F    | S   | Q    | L     | K   | E   | LEGV | ----- | PV    | IN    | I  | H     | WF  | DR  | KL  | T    | -   | TV   | DH           | LL             | FS | R  | SP | LLSVYADMSTTC |    |              |   |    |              |   |   |   |   |   |   |   |   |   |   |   |   |   |   |   |   |   |   |   |
| Synechococcus   | 288 | --- | QME  | V    | F    | R   | K    | L     | D   | G   | L    | R     | GV    | ----- | PV | IN    | L   | H   | L   | WF   | DR  | KL   | T            | -              | D  | I  | D  | H            | LL | FS           | R | SP | LLSVYADMSTTC |   |   |   |   |   |   |   |   |   |   |   |   |   |   |   |   |   |   |   |
| Haliscomenobact | 292 | --- | NY   | D    | A    | A   | Y    | W     | D   | K   | R    | V     | M     | A     | P  | ----- | SS  | L   | F   | Y    | L   | G    | V            | N              | K  | R  | L  | K            | N  | L            | H | H  | N            | L | F | F | D | E | D | F | T | Q | H | A | I | E | I | Y | D | D | P |   |
| Saprospira      | 292 | --- | NY   | N    | E    | R   | Y    | W     | D   | K   | R    | V     | M     | A     | P  | ----- | SS  | L   | F   | Y    | L   | G    | V            | N              | K  | P  | L  | N            | N  | L            | L | H  | H            | N | L | F | F | D | E | D | F | K | L | H | A | Q | E | I | Y | K | T | P |
| Fulvivirga      | 292 | --- | KY   | D    | Q    | K   | Y    | W     | D   | K   | R    | A     | L     | A     | P  | ----- | SS  | L   | F   | Y    | L   | G    | V            | D              | K  | K  | I  | S            | H  | L            | L | H  | H            | N | L | F | F | D | E | D | F | E | Q | H | A | Q | E | I | Y | E | Q | P |
| Pedobacter      | 301 | --- | NY   | S    | E    | Q   | Y    | W     | S   | S   | R    | V     | L     | A     | P  | ----- | SS  | L   | F   | Y    | L   | G    | I            | D              | R  | K  | I  | P            | G  | L            | N | H  | H            | T | L | F | F | D | E | D | L | N | H | A | Q | E | I | Y | K | A | P |   |
| Cyclobacterium  | 294 | --- | NY   | S    | D    | K   | Y    | W     | D   | S   | R    | V     | L     | A     | P  | ----- | SS  | L   | F   | Y    | L   | G    | V            | N              | K  | R  | L  | K            | N  | L            | L | H  | H            | N | L | F | F | D | E | D | P | L | E | P | H | A | I | Y | T | N | P |   |
| Haloquadratum   | 302 | --- | QY   | D    | P    | D   | Y    | W     | D   | S   | R    | T     | Y     | A     | P  | ----- | SA  | F   | L   | L    | Y   | L    | G            | V              | E  | G  | D  | V            | D  | L            | A | H  | H            | S | L | V | L | P | T | D | W | D | D | H | F | E | Q | I | F | D | D | P |
| Natrinema       | 295 | --- | GH   | D    | A    | D   | Y    | W     | D   | D   | R    | T     | Y     | A     | P  | ----- | SA  | F   | L   | L    | Y   | L    | G            | V              | E  | G  | D  | V            | D  | L            | A | H  | H            | T | L | V | L | P | T | D | W | Q | D | H | F | D | Q | I | F | E | D | P |

|                 |     |    |    |    |   |   |   |   |   |   |   |   |   |   |   |   |   |   |   |   |   |   |   |   |   |   |   |   |   |   |   |   |   |   |   |   |   |    |    |    |    |    |    |   |   |   |   |   |   |   |   |   |   |   |   |   |   |   |   |
|-----------------|-----|----|----|----|---|---|---|---|---|---|---|---|---|---|---|---|---|---|---|---|---|---|---|---|---|---|---|---|---|---|---|---|---|---|---|---|---|----|----|----|----|----|----|---|---|---|---|---|---|---|---|---|---|---|---|---|---|---|---|
| KH105_crtIBY1   | 403 | TW | AE | EP | V | F | Y | V | S | A | T | S | K | T | D | P | S | V | T | G | O | G | E | A | L | F | V | L | V | P | I | S | Y | Q | L | N | G | -- | TD | NA | AR | RE | Q  | I | L | H | T | V | L | T | R | M |   |   |   |   |   |   |   |
| KH105_crtIBY2   | 403 | TW | AE | EP | V | F | Y | V | S | A | T | S | K | T | D | P | S | V | S | G | O | G | E | A | L | F | V | L | V | P | I | S | Y | Q | L | N | G | -- | TD | NA | AR | RE | H  | I | L | H | T | V | L | T | R | M |   |   |   |   |   |   |   |
| Brevundimonas   | 341 | DL | PQ | DF | S | L | Y | L | H | A | P | T | R | T | D | P | S | L | A | P | E | G | C | D | A | F | Y | V | L | A | P | V | P | H | L | A | S | A  | D  | -- | ID | WA | VE | G | P | R | Y | R | D | R | V | L | A | Y | L |   |   |   |   |
| Xanthophyllomyc | 370 | GL | PA | D  | P | S | F | Y | V | N | V | P | S | R | I | D | P | S | A | A | P | E | G | K | D | A | I | V | I | L | V | P | C | G | H | I | D | A  | S  | N  | P  | O  | D  | Y | N | K | L | V | A | R | A | R | K | F | V | I | H | T | L |
| Arabidopsis     | 428 | KE | Y  | D  | E | N | R | S | M | L | E | L | V | F | A | P | A | E | E | W | I | S | R | T | D | S | D | I | I | D | A | T | M | K | E | L | K | L  | -- | FP | DE | I  | S  | A | D | Q | S | K | A | K | I | L | K | Y | H |   |   |   |   |
| Haematococcus   | 406 | KE | Y  | A  | D | E | K | S | M | L | E | L | V | F | A | P | A | K | E | W | I | G | R | P | D | E | E | I | I | A | A | T | M | T | E | L | E | R  | L  | -- | FP | TE | V  | R | A | D | Q | S | M | A | K | I | L | K | Y | K |   |   |   |
| Thalassiosira   | 418 | VT | AE | E  | N | C | A | L | V | S | I | P | S | V | H | D | N | T | L | A | P | D | N | H | A | V | L | H | I | Y | T | P | A | T | E | L | Y | E  | R  | W  | E  | N  | V  | K | R | N | T | P | E | Y | N | Q | L | K | E | R | S | A |   |
| Ectocarpus      | 436 | KG | Y  | R  | D | D | D | K | S | M | L | E | L | V | F | A | P | A | K | D | W | I | G | S | D | E | D | I | I | E | A | T | M | G | E | L | Y | R  | L  | -- | FP | N  | E  | L | S | K | D | G | S | G | A | K | L | L | K | S | A |   |   |
| Chlamydomonas   | 407 | KE | Y  | D  | E | T | E | K | S | M | L | E | L | V | F | A | P | A | K | D | W | I | G | R | S | D | E | D | I | I | A | A | T | M | T | E | L | E  | R  | L  | -- | FP | TE | I | K | A | D | Q | S | L | A | K | I | R | K | Y | K |   |   |
| Synechococcus   | 339 | KE | Y  | E  | D | P | D | K | S | M | L | E | L | V | F | A | P | A | K | D | W | I | G | R | P | D | E | E | I | I | E | A | T | M | S | E | L | H  | K  | L  | -- | FP | M  | H | F | G | G | D | N | P | - | A | T | L | L | K | Y | K |   |
| Haliscomenobact | 344 | RW | PE | K  | P | L | F | Y | V | C | A | P | S | I | T | D | E | T | V | A | P | E | G | H | E | N | L | F | V | L | P | V | A | P | N | L | E | -- | D  | T  | E  | A  | R  | R | E | Q | Y | N | L | V | M | E | R | L |   |   |   |   |   |
| Saprospira      | 344 | KW | P  | S  | K | P | L | F | Y | A | C | L | A | S | K | T | D | P | S | C | A | P | E | G | H | E | N | L | F | L | V | P | V | A | P | E | L | E  | -- | D  | T  | E  | A  | T | R | E | H | Y | N | L | V | M | D | R | L |   |   |   |   |
| Fulvivirga      | 344 | GW | P  | Q  | K | P | L | F | Y | V | C | T | S | K | T | D | P | G | C | A | P | E | G | H | E | N | L | F | V | L | P | V | A | P | G | L | E | -- | D  | R  | M  | E  | I  | R | E | R | Y | D | L | V | M | D | R | I |   |   |   |   |   |
| Pedobacter      | 353 | QW | P  | S  | K | P | L | F | Y | V | C | C | P | S | K | T | D | E | D | V | A | P | E | G | H | E | N | I | F | I | L | M | P | L | A | V | G | L  | E  | -- | D  | N  | D  | T | L | R | N | T | Y | F | N | S | I | M | T | R | L |   |   |
| Cyclobacterium  | 346 | RW | PE | K  | P | L | F | Y | A | S | V | P | S | I | T | D | A | T | V | A | P | E | G | M | E | N | L | F | L | L | I | P | L | A | P | D | L | E  | -- | D  | S  | E  | A  | T | R | N | K | Y | F | N | I | M | S | R | L |   |   |   |   |
| Haloquadratum   | 354 | AW | P  | A  | D | P | A | Y | L | C | V | P | S | Q | T | D | D | D | V | A | P | D | G | H | S | N | L | F | A | L | V | P | I | A | A | G | L | D  | -- | D  | S  | E  | E  | H | R | Q | R | Y | R | N | L | I | L | D | D | I |   |   |   |
| Natrinema       | 347 | QW | P  | D  | D | P | A | Y | L | C | V | P | S | R | T | D | D | D | V | A | P | E | G | H | S | A | L | F | V | L | V | P | I | A | P | G | L | E  | -- | D  | T  | P  | A  | I | R | D | E | Y | R | D | V | I | L | D | D | I |   |   |   |

|                 |     |               |                                                       |
|-----------------|-----|---------------|-------------------------------------------------------|
| KH105_crtIBY1   | 461 | EENLKQ-PLREWL | VYQKSYGTTDFERDFHSFRGNAFGHANTLSOSLVLKPSMDS-LLNNL       |
| KH105_crtIBY2   | 461 | EENLKQ-PLREWL | VYQKSYGTTDFERDFHSFRGNAFGHANTLSOSLVLKPSMDS-LLNNL       |
| Brevundimonas   | 400 | EQHYIP-GLTAHL | DTCRIFTPVDFRDQLNAHQGSASFLEPILTSAYFRVHNRDDOIPNL        |
| Xanthophyllomyc | 430 | SAKLGLP       | DFEKMIVAEKVHDAPSWKEFNLKDGSIILGLAHNFMQVLGFRPSTRHPKYDKL |
| Arabidopsis     | 486 | VVKTPR-SVYKT  | IPNCEPCRPQRSPIEGFYLAGDYTKQKYLAS---MEGAVLSGKFCSQ       |
| Haematococcus   | 464 | VVKTPR-SVYKT  | STAGREKFRPTORSPISNFYLAGDYTKQKYLAS---MEGAVFSGKLVTE     |
| Thalassiosira   | 478 | FLWKVLEKI     | IPDTRQRAVHSKVGTPLTTHQRFNRYRGSYGPAIRAGDASFPFPNTPIQGL   |
| Ectocarpus      | 494 | VVKTPR-SVYE   | EATAGRELYRPVQTTPVSNFFLAGCFTKQKYLAS---MEGATFSGKLAAR    |
| Chlamydomonas   | 465 | VIKTPL-SVYES  | RAGREAFRPSORTPIKNFFLAGDFTKQKYLAS---MEGAIFSGKLAAE      |
| Synechococcus   | 396 | VVKTPR-SVYKT  | TPGCQQLRPDQTTPIKNFFLAGDYTMORYLAS---MEGAVLSGKLCAG      |
| Haliscomenobact | 400 | ERLTGQ-EIRSA  | VVYKRSYAHADFDYHAFKGNAYGLANTLFOATFLKPKLRSKKIKNL        |
| Saprospira      | 400 | EALTGQ-EIRSA  | VVDYKLSYAHKDFKKDYAVKGNAYGLANTLSOTAFLLKPRLLKNNKLNNE    |
| Fulvivirga      | 400 | EKLTGE-ALKEH  | IVYKRSYAHNDFIEDYNAFRGNAYGLANTLROTAILKPSIHNKVRNL       |
| Pedobacter      | 409 | ETFTGM-AIREH  | IDYQKSYCVSDFVSDYNSYKGNAYGLANTLMOTANLKPSLKNKKIDNL      |
| Cyclobacterium  | 402 | EKHTGQ-DIRSH  | IVNRSYVHDFKKDYHAFKGNAYGLANTLROTAILKPSLRNKKLTNL        |
| Haloquadratum   | 410 | AEHTGV-DLRDR  | IVNRSYVHDFADRYNSTAGTALGLAHTLEOTALLRPGHHSSAVDGL        |
| Natrinema       | 403 | AENTGT-DLRDR  | IVLEERFSVADFAGRYNSYGGTALGLAHTLROTALLFRPPHRSAEVDGL     |

|                 |     |               |                                                   |
|-----------------|-----|---------------|---------------------------------------------------|
| KH105_crtIBY1   | 519 | VFAGHLTNPGPGV | PPSIVSGTVSANLLHDKLOVTANHHLLGFTLLGALLGALFLGILTLS   |
| KH105_crtIBY2   | 519 | VFAGHLTNPGPGV | PPSIVSGTVSANLLHDKLOVTANHHSLGFFALLGALLGALFLGILALS  |
| Brevundimonas   | 459 | YFVGAGTHPGAGV | PGVVGSAKATAGLMIEDAGRTA-----                       |
| Xanthophyllomyc | 490 | FFVGASTHPG    | TGVPVLAGAKLTANQVLESFDRSPAPDPNMSLSVPYGKPLKSNGTGIDS |
| Arabidopsis     | 542 | SIVQDYELLA    | AASGPRKLSEATVSSS-----                             |
| Haematococcus   | 520 | AIVEDWSARGV   | TSSAASROPALAAAGVVAGSAAVIGAALVAASGALAGGM-----      |
| Thalassiosira   | 538 | LLCGDSCFPGI   | GVPAVAGSGMIAANSVSLDSIGAQLEVLISKIKQO-----          |
| Ectocarpus      | 550 | ALCD--AAIAG   | TVPLQKSSAVAA-----                                 |
| Chlamydomonas   | 521 | QIVNDYNYKGV   | APPARSSSPPELVAASALLAVAAGVAGLVGFGGR-----           |
| Synechococcus   | 452 | AVDQKRDQL     | SSSTP--VSEPVA-----                                |
| Haliscomenobact | 459 | FFTQGLTTPG    | PGVPPSLISGOVVAREVSKLLQ-----                       |
| Saprospira      | 459 | YYAGQLTTPG    | PGVPPSLISGEVVAREIISKSG-----                       |
| Fulvivirga      | 459 | FYTQGLTVP     | GGVPPSIISGOVVAGEVIGRYEI-----                      |
| Pedobacter      | 468 | FYAGQLTVP     | GGVPPSIVSGNVAAQOLIKYINR-----                      |
| Cyclobacterium  | 461 | YYSQGLTVP     | GGVPPSLISGEVVAKIINKNTINK-----                     |
| Haloquadratum   | 469 | YFTGSFTTP     | GGIIVPMCLISGOLTAEKMAADRAT-----                    |
| Natrinema       | 462 | YFVGGDTPG     | IIVPMCLISGDLTAEKVLEDHGLEG-----                    |

|                 |     |          |                   |                      |                             |
|-----------------|-----|----------|-------------------|----------------------|-----------------------------|
| KH105_crtIBY1   | 579 | VFSTRFVS | SYVECI            | RLLYVHGRTYFAAATLMKPM | AFLDTAAMYGLFRVADDYVDNVGDAGE |
| KH105_crtIBY2   | 579 | VFSTRFVS | SYVECI            | RLLYVHGRTYFAAATLMKPM | AFLDTAAMYGLFRVADDYVDNVGDAGE |
| Brevundimonas   |     |          |                   |                      | -----                       |
| Xanthophyllomyc | 550 | QVQLKFM  | DLERWVYLLVLLIGAVI | ARSVGV               | LAF-----                    |
| Arabidopsis     |     |          |                   |                      | -----                       |
| Haematococcus   |     |          |                   |                      | -----                       |
| Thalassiosira   |     |          |                   |                      | -----                       |
| Ectocarpus      |     |          |                   |                      | -----                       |
| Chlamydomonas   |     |          |                   |                      | -----                       |
| Synechococcus   |     |          |                   |                      | -----                       |
| Haliscomenobact |     |          |                   |                      | -----                       |
| Saprospira      |     |          |                   |                      | -----                       |
| Fulvivirga      |     |          |                   |                      | -----                       |
| Pedobacter      |     |          |                   |                      | -----                       |
| Cyclobacterium  |     |          |                   |                      | -----                       |
| Haloquadratum   |     |          |                   |                      | -----                       |
| Natrinema       |     |          |                   |                      | -----                       |

|                 |     |                                |        |           |                 |
|-----------------|-----|--------------------------------|--------|-----------|-----------------|
| KH105_crtIBY1   | 639 | RQRNLDAFMADFWRCWESGRGDYARHPTLP | AIIESA | HRRAYPREL | FERFFRSMRMDAKRK |
| KH105_crtIBY2   | 639 | RQRNLDAFMADFWRCWESGRGDYARHPTLP | AIIESA | HRRAYPREL | FERFFRSMRMDAKRK |
| Brevundimonas   |     | -----                          |        |           |                 |
| Xanthophyllomyc |     | -----                          |        |           |                 |
| Arabidopsis     |     | -----                          |        |           |                 |
| Haematococcus   |     | -----                          |        |           |                 |
| Thalassiosira   |     | -----                          |        |           |                 |
| Ectocarpus      |     | -----                          |        |           |                 |
| Chlamydomonas   |     | -----                          |        |           |                 |
| Synechococcus   |     | -----                          |        |           |                 |
| Haliscomenobact |     | -----                          |        |           |                 |
| Saprospira      |     | -----                          |        |           |                 |
| Fulvivirga      |     | -----                          |        |           |                 |
| Pedobacter      |     | -----                          |        |           |                 |
| Cyclobacterium  |     | -----                          |        |           |                 |
| Haloquadratum   |     | -----                          |        |           |                 |
| Natrinema       |     | -----                          |        |           |                 |

|                 |     |                                           |                     |
|-----------------|-----|-------------------------------------------|---------------------|
| KH105_crtIBY1   | 699 | VVCLTMDDTMEYMEGSAAVIGEFMLPILMPDRDSLAFKQAI | PHARDLGLAFQITNMLRDI |
| KH105_crtIBY2   | 699 | VVCLTMDDTMEYMEGSAAVIGEFMLPILMPDRDSLAFKQAI | PHARDLGLAFQITNMLRDI |
| Brevundimonas   |     | -----                                     |                     |
| Xanthophyllomyc |     | -----                                     |                     |
| Arabidopsis     |     | -----                                     |                     |
| Haematococcus   |     | -----                                     |                     |
| Thalassiosira   |     | -----                                     |                     |
| Ectocarpus      |     | -----                                     |                     |
| Chlamydomonas   |     | -----                                     |                     |
| Synechococcus   |     | -----                                     |                     |
| Haliscomenobact |     | -----                                     |                     |
| Saprospira      |     | -----                                     |                     |
| Fulvivirga      |     | -----                                     |                     |
| Pedobacter      |     | -----                                     |                     |
| Cyclobacterium  |     | -----                                     |                     |
| Haloquadratum   |     | -----                                     |                     |
| Natrinema       |     | -----                                     |                     |

|                 |     |                            |                                    |
|-----------------|-----|----------------------------|------------------------------------|
| KH105_crtIBY1   | 759 | GEDNRLGRQYIPVDACNRHGLNGKLT | SHEQPGFRELMEEMFAFTDNLYASADLGIDMLPE |
| KH105_crtIBY2   | 759 | GEDNRLGRQYIPVDACKRHGLNGKLT | SHEQPGFRELMEEMFAFTDNLYASADLGIDMLPE |
| Brevundimonas   |     | -----                      |                                    |
| Xanthophyllomyc |     | -----                      |                                    |
| Arabidopsis     |     | -----                      |                                    |
| Haematococcus   |     | -----                      |                                    |
| Thalassiosira   |     | -----                      |                                    |
| Ectocarpus      |     | -----                      |                                    |
| Chlamydomonas   |     | -----                      |                                    |
| Synechococcus   |     | -----                      |                                    |
| Haliscomenobact |     | -----                      |                                    |
| Saprospira      |     | -----                      |                                    |
| Fulvivirga      |     | -----                      |                                    |
| Pedobacter      |     | -----                      |                                    |
| Cyclobacterium  |     | -----                      |                                    |
| Haloquadratum   |     | -----                      |                                    |
| Natrinema       |     | -----                      |                                    |

|                 |     |                                          |                      |
|-----------------|-----|------------------------------------------|----------------------|
| KH105_crtIBY1   | 819 | QVRDVIRVARLAYHRIHDKIRAANYDIFTARRRVPLREKL | TILVDTVPRLKLARIALTEL |
| KH105_crtIBY2   | 819 | QVRDVIRVARLAYHRIHDKIRAANYDIFTARRRVPLREKL | TILVDTVPRLKLARIALTEL |
| Brevundimonas   |     | -----                                    | -----                |
| Xanthophyllomyc |     | -----                                    | -----                |
| Arabidopsis     |     | -----                                    | -----                |
| Haematococcus   |     | -----                                    | -----                |
| Thalassiosira   |     | -----                                    | -----                |
| Ectocarpus      |     | -----                                    | -----                |
| Chlamydomonas   |     | -----                                    | -----                |
| Synechococcus   |     | -----                                    | -----                |
| Haliscomenobact |     | -----                                    | -----                |
| Saprospira      |     | -----                                    | -----                |
| Fulvivirga      |     | -----                                    | -----                |
| Pedobacter      |     | -----                                    | -----                |
| Cyclobacterium  |     | -----                                    | -----                |
| Haloquadratum   |     | -----                                    | -----                |
| Natrinema       |     | -----                                    | -----                |

|                 |     |                                             |                    |
|-----------------|-----|---------------------------------------------|--------------------|
| KH105_crtIBY1   | 879 | ICAALYGLSRPHIAFVWIGAVWASWLEWPGCSYLRFHGLFVVP | LLMLARLAHQRAVADK   |
| KH105_crtIBY2   | 879 | ICAALYGLSRPHIAFVWIGAVWASWLEWPGCSYLRFHGLFVIP | PLLLLLARLAHQRAVADK |
| Brevundimonas   |     | -----                                       | -----              |
| Xanthophyllomyc |     | -----                                       | -----              |
| Arabidopsis     |     | -----                                       | -----              |
| Haematococcus   |     | -----                                       | -----              |
| Thalassiosira   |     | -----                                       | -----              |
| Ectocarpus      |     | -----                                       | -----              |
| Chlamydomonas   |     | -----                                       | -----              |
| Synechococcus   |     | -----                                       | -----              |
| Haliscomenobact |     | -----                                       | -----              |
| Saprospira      |     | -----                                       | -----              |
| Fulvivirga      |     | -----                                       | -----              |
| Pedobacter      |     | -----                                       | -----              |
| Cyclobacterium  |     | -----                                       | -----              |
| Haloquadratum   |     | -----                                       | -----              |
| Natrinema       |     | -----                                       | -----              |

|                 |     |                                         |                    |
|-----------------|-----|-----------------------------------------|--------------------|
| KH105_crtIBY1   | 939 | QVPFLRRAGFWTLALCVVATLYTTPWDNFLVYRRVWGYP | PERILFVIGYVPVEEYMF |
| KH105_crtIBY2   | 939 | QVPFLRRAGFWTLALCVVATLYTTPWDNFLVYRRVWGYP | PERILFVIGYVPIEEYMF |
| Brevundimonas   |     | -----                                   | -----              |
| Xanthophyllomyc |     | -----                                   | -----              |
| Arabidopsis     |     | -----                                   | -----              |
| Haematococcus   |     | -----                                   | -----              |
| Thalassiosira   |     | -----                                   | -----              |
| Ectocarpus      |     | -----                                   | -----              |
| Chlamydomonas   |     | -----                                   | -----              |
| Synechococcus   |     | -----                                   | -----              |
| Haliscomenobact |     | -----                                   | -----              |
| Saprospira      |     | -----                                   | -----              |
| Fulvivirga      |     | -----                                   | -----              |
| Pedobacter      |     | -----                                   | -----              |
| Cyclobacterium  |     | -----                                   | -----              |
| Haloquadratum   |     | -----                                   | -----              |
| Natrinema       |     | -----                                   | -----              |

|                 |     |                                                              |
|-----------------|-----|--------------------------------------------------------------|
| KH105_crtIBY1   | 999 | ETMLVAAVWLQVFQPTTLQAEVGPRGKGGMLVLASLGLVWIAGLSCLASEQSLYIGLILT |
| KH105_crtIBY2   | 999 | ETMLVAAVWLQVFQPTTLQAEVGPRGKGGMLVLASLGLVWMAGLSCLASEQSLYIGLILT |
| Brevundimonas   |     | -----                                                        |
| Xanthophyllomyc |     | -----                                                        |
| Arabidopsis     |     | -----                                                        |
| Haematococcus   |     | -----                                                        |
| Thalassiosira   |     | -----                                                        |
| Ectocarpus      |     | -----                                                        |
| Chlamydomonas   |     | -----                                                        |
| Synechococcus   |     | -----                                                        |
| Haliscomenobact |     | -----                                                        |
| Saprospira      |     | -----                                                        |
| Fulvivirga      |     | -----                                                        |
| Pedobacter      |     | -----                                                        |
| Cyclobacterium  |     | -----                                                        |
| Haloquadratum   |     | -----                                                        |
| Natrinema       |     | -----                                                        |

|                 |      |                                                              |
|-----------------|------|--------------------------------------------------------------|
| KH105_crtIBY1   | 1059 | WAMPVLILQWSLGAHVLTTHAKPVLTTIVSATAYLCVADAWAIRHGIWRINPANLVLPNG |
| KH105_crtIBY2   | 1059 | WAMPVLILQWSLGAHVLTTHAKPVLKTIVSATAYLCVADAWAIRHGIWRINPANLVLPNG |
| Brevundimonas   |      | -----                                                        |
| Xanthophyllomyc |      | -----                                                        |
| Arabidopsis     |      | -----                                                        |
| Haematococcus   |      | -----                                                        |
| Thalassiosira   |      | -----                                                        |
| Ectocarpus      |      | -----                                                        |
| Chlamydomonas   |      | -----                                                        |
| Synechococcus   |      | -----                                                        |
| Haliscomenobact |      | -----                                                        |
| Saprospira      |      | -----                                                        |
| Fulvivirga      |      | -----                                                        |
| Pedobacter      |      | -----                                                        |
| Cyclobacterium  |      | -----                                                        |
| Haloquadratum   |      | -----                                                        |
| Natrinema       |      | -----                                                        |

|                 |      |                                                             |
|-----------------|------|-------------------------------------------------------------|
| KH105_crtIBY1   | 1119 | KYALPLEEALFFLVTSIMCTWGLTLAMVLWGKPIGLAVGVGTWARPPRPGRSQITCGAV |
| KH105_crtIBY2   | 1119 | KHALPLEEALFFLVTSIMCTWGLTLAMVLWGKPIGLAVGMGTWARPPRPGRSQITCGAV |
| Brevundimonas   |      | -----                                                       |
| Xanthophyllomyc |      | -----                                                       |
| Arabidopsis     |      | -----                                                       |
| Haematococcus   |      | -----                                                       |
| Thalassiosira   |      | -----                                                       |
| Ectocarpus      |      | -----                                                       |
| Chlamydomonas   |      | -----                                                       |
| Synechococcus   |      | -----                                                       |
| Haliscomenobact |      | -----                                                       |
| Saprospira      |      | -----                                                       |
| Fulvivirga      |      | -----                                                       |
| Pedobacter      |      | -----                                                       |
| Cyclobacterium  |      | -----                                                       |
| Haloquadratum   |      | -----                                                       |
| Natrinema       |      | -----                                                       |

|                 |      |                                                              |
|-----------------|------|--------------------------------------------------------------|
| KH105_crtIBY1   | 1179 | LVLSISHPALFKMVPALVVTIMRFGFWACALMAGVHLPARGRVLFVAAVVAISCAPAALA |
| KH105_crtIBY2   | 1179 | LVLSISHPALFKMVPALVVTIMRFGFWACALMAGVHLPARGRVLFVAAVVAISCAPAALA |
| Brevundimonas   |      | -----                                                        |
| Xanthophyllomyc |      | -----                                                        |
| Arabidopsis     |      | -----                                                        |
| Haematococcus   |      | -----                                                        |
| Thalassiosira   |      | -----                                                        |
| Ectocarpus      |      | -----                                                        |
| Chlamydomonas   |      | -----                                                        |
| Synechococcus   |      | -----                                                        |
| Haliscomenobact |      | -----                                                        |
| Saprospira      |      | -----                                                        |
| Fulvivirga      |      | -----                                                        |
| Pedobacter      |      | -----                                                        |
| Cyclobacterium  |      | -----                                                        |
| Haloquadratum   |      | -----                                                        |
| Natrinema       |      | -----                                                        |

|                 |      |                                |
|-----------------|------|--------------------------------|
| KH105_crtIBY1   | 1239 | PLLAGTVLVGTLGGWHTRDRDDLPLYKNA  |
| KH105_crtIBY2   | 1239 | PLLAGTVLVGTLGGWHTRDREDTLPLYKNA |
| Brevundimonas   |      | -----                          |
| Xanthophyllomyc |      | -----                          |
| Arabidopsis     |      | -----                          |
| Haematococcus   |      | -----                          |
| Thalassiosira   |      | -----                          |
| Ectocarpus      |      | -----                          |
| Chlamydomonas   |      | -----                          |
| Synechococcus   |      | -----                          |
| Haliscomenobact |      | -----                          |
| Saprospira      |      | -----                          |
| Fulvivirga      |      | -----                          |
| Pedobacter      |      | -----                          |
| Cyclobacterium  |      | -----                          |
| Haloquadratum   |      | -----                          |
| Natrinema       |      | -----                          |
