# Supplementary material for: A Possible Trifunctional β-Carotene Synthase Gene Identified in the Draft Genome of Aurantiochytrium sp. Strain KH105
Source: MDPI journal article supplement (doi:10.3390/genes9040200), 2018-04-09
Supplement: s1 [file s1]

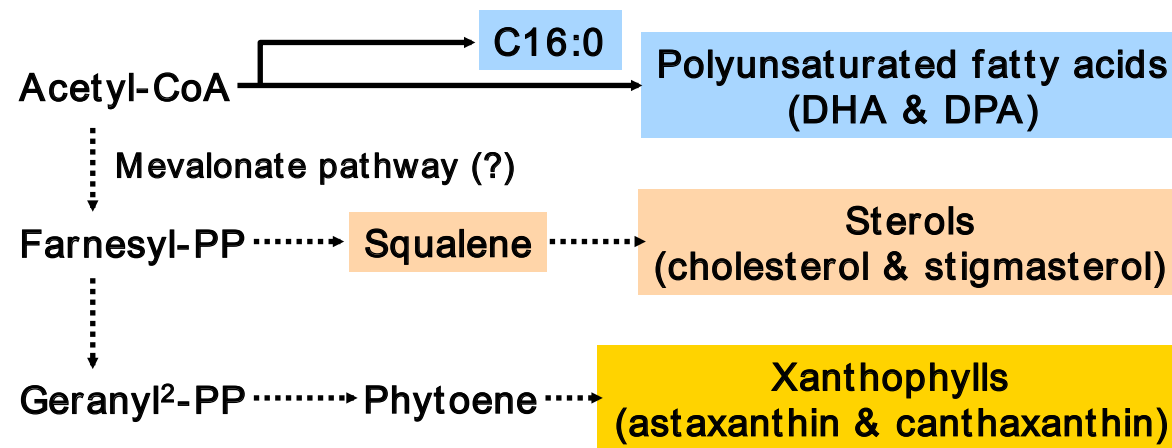

**Supplementary Figure S9:** Biosynthetic pathways for three major compounds in *Aurantiochytrium* sp. KH105 strain.
