# Supplementary material for: A Possible Trifunctional β-Carotene Synthase Gene Identified in the Draft Genome of Aurantiochytrium sp. Strain KH105
Source: MDPI journal article supplement (doi:10.3390/genes9040200), 2018-04-09
Supplement: s1 [file s1]

Supplementary Table S1: Summary of the Roche 454 and Illumina Miseq and GAIIX data used for assembling *Aurantiochytrium* sp. KH105.

|       |                | Used data                  |                                 |                                | Assembly |             |                         |          |             |                         |
|-------|----------------|----------------------------|---------------------------------|--------------------------------|----------|-------------|-------------------------|----------|-------------|-------------------------|
|       |                | Total<br>sequences<br>(Gb) | Number of<br>reads<br>(million) | Average<br>read length<br>(bp) | Contig   |             |                         | Scaffold |             |                         |
|       |                |                            |                                 |                                | Number   | N50<br>(kb) | Total<br>length<br>(Mb) | Number   | N50<br>(kb) | Total<br>length<br>(Mb) |
| 454   | Shotgun        | 2.9                        | 4.4                             | 661                            | 2,038    | 71.2        | 76.5                    | 512      | 366.9       | 76.7                    |
| Miseq | Shotgun        | 1.4                        | 5.4                             | 249                            |          |             |                         |          |             |                         |
| GAllx | 3-kb mate pair | 4.6                        | 30.9                            | 148                            |          |             |                         |          |             |                         |
