# Supplementary material for: A Possible Trifunctional β-Carotene Synthase Gene Identified in the Draft Genome of Aurantiochytrium sp. Strain KH105
Source: MDPI journal article supplement (doi:10.3390/genes9040200), 2018-04-09
Supplement: s1 [file s1]

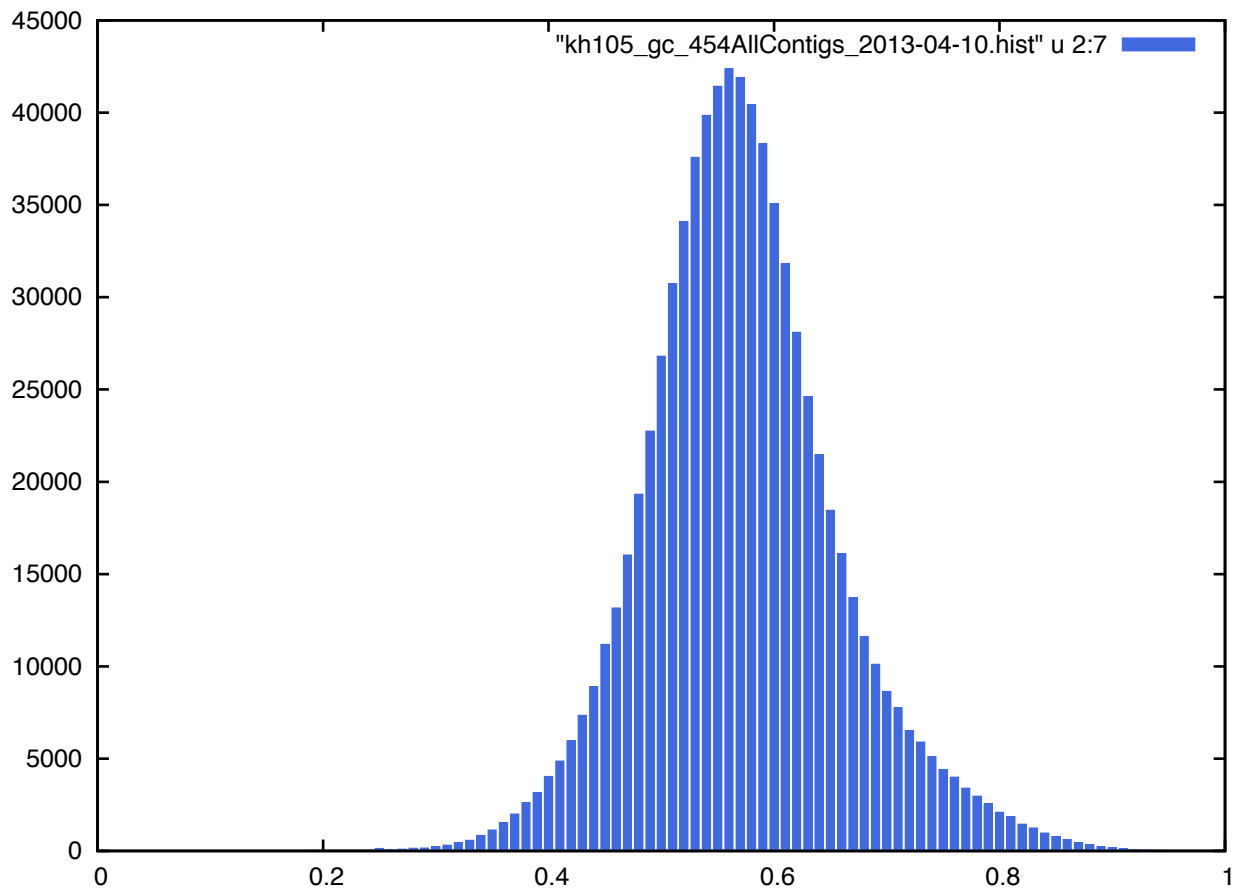

**Supplementary Figure S2:** GC content within sequences of the *Aurantiochytrium* sp. KH105 genome. The vertical axis shows the number of each region 50 bp window while the horizontal axis indicates GC content (%). The peak indicates that the GC content is 55%.
