# Supplementary material for: A Possible Trifunctional β-Carotene Synthase Gene Identified in the Draft Genome of Aurantiochytrium sp. Strain KH105
Source: MDPI journal article supplement (doi:10.3390/genes9040200), 2018-04-09
Supplement: s1 [file s1]

|                 |   |                                                               |
|-----------------|---|---------------------------------------------------------------|
| KH105_crtIBY1   | 1 | MARRASRPVAAVVVVVLVVVASACCWQAAADVADAQGARGPGRESGDRAKKRIAVLGAGY  |
| KH105_crtIBY2   | 1 | MARRASRLVAAIVVVVLVVVAPACCRQAAADVADAQGARGPGQESDGGRAKKRIAVLGAGY |
| Brevundimonas   | 1 | -----                                                         |
| Xanthophyllomyc | 1 | -----                                                         |
| Arabidopsis     | 1 | -----                                                         |
| Haematococcus   | 1 | -----                                                         |
| Thalassiosira   | 1 | -----                                                         |
| Ectocarpus      | 1 | -----                                                         |
| Chlamydomonas   | 1 | -----                                                         |
| Synechococcus   | 1 | -----                                                         |
| Haliscomenobact | 1 | -----                                                         |
| Pedobacter      | 1 | -----                                                         |
| Fulvivirga      | 1 | -----                                                         |
| Haloquadratum   | 1 | -----                                                         |
| Natrinema       | 1 | -----                                                         |
| Cyclobacterium  | 1 | -----                                                         |

|                 |    |                                                                |
|-----------------|----|----------------------------------------------------------------|
| KH105_crtIBY1   | 61 | AGLSAACELSR LGHEVVVLEKNDYVG GRAHQFEVEADNGQTFKFDAGPSWYWMPEVFDRF |
| KH105_crtIBY2   | 61 | AGLSAACELSR LGHEVVVLEKNDYVG GRAHQFEVEADNGQTFKFDAGPSWYWMPEVFDRF |
| Brevundimonas   | 1  | -----                                                          |
| Xanthophyllomyc | 1  | -----                                                          |
| Arabidopsis     | 1  | -----                                                          |
| Haematococcus   | 1  | -----                                                          |
| Thalassiosira   | 1  | -----                                                          |
| Ectocarpus      | 1  | -----                                                          |
| Chlamydomonas   | 1  | -----                                                          |
| Synechococcus   | 1  | -----                                                          |
| Haliscomenobact | 1  | -----                                                          |
| Pedobacter      | 1  | -----                                                          |
| Fulvivirga      | 1  | -----                                                          |
| Haloquadratum   | 1  | -----                                                          |
| Natrinema       | 1  | -----                                                          |
| Cyclobacterium  | 1  | -----                                                          |

|                 |     |                                                              |
|-----------------|-----|--------------------------------------------------------------|
| KH105_crtIBY1   | 121 | FARYGRTVQEFYQLERLDPAYRIIRNDHNGEGTVDVPGASSEAFMSWARQMNGDARLVDR |
| KH105_crtIBY2   | 121 | FARYGRTVQEFYQLERLDPAYRIIRNDHNGEGTVDVPGASSEAFMSWARQMNGDARLVDR |
| Brevundimonas   | 1   | -----                                                        |
| Xanthophyllomyc | 1   | -----                                                        |
| Arabidopsis     | 1   | -----                                                        |
| Haematococcus   | 1   | -----                                                        |
| Thalassiosira   | 1   | -----                                                        |
| Ectocarpus      | 1   | -----                                                        |
| Chlamydomonas   | 1   | -----                                                        |
| Synechococcus   | 1   | -----                                                        |
| Haliscomenobact | 1   | -----                                                        |
| Pedobacter      | 1   | -----                                                        |
| Fulvivirga      | 1   | -----                                                        |
| Haloquadratum   | 1   | -----                                                        |
| Natrinema       | 1   | -----                                                        |
| Cyclobacterium  | 1   | -----                                                        |

|                 |     |                                                               |
|-----------------|-----|---------------------------------------------------------------|
| KH105_crtIBY1   | 181 | LMDEAKAKYE EGVFKWIWHPMVSWWEMIDLNLVRAALQYDMFNSFVAHLQKYISSDTLLM |
| KH105_crtIBY2   | 181 | LMDEAKAKYE EGVFKWIWHPMVSWWEMIDLNLVRAALQYDMFNSFVAHLQKYISSDTLLM |
| Brevundimonas   | 1   | -----                                                         |
| Xanthophyllomyc | 1   | -----                                                         |
| Arabidopsis     | 1   | -----                                                         |
| Haematococcus   | 1   | -----                                                         |
| Thalassiosira   | 1   | -----                                                         |
| Ectocarpus      | 1   | -----                                                         |
| Chlamydomonas   | 1   | -----                                                         |
| Synechococcus   | 1   | -----                                                         |
| Haliscomenobact | 1   | -----                                                         |
| Pedobacter      | 1   | -----                                                         |
| Fulvivirga      | 1   | -----                                                         |
| Haloquadratum   | 1   | -----                                                         |
| Natrinema       | 1   | -----                                                         |
| Cyclobacterium  | 1   | -----                                                         |

**Supplementary Figure S5:** Alignment of CrtB1 and CrtB2 amino acids within CrtKH105\_CrtIBY1 and CrtKH105\_CrtIBY2 with those of other eukaryotes.

|                 |     |                                                      |              |
|-----------------|-----|------------------------------------------------------|--------------|
| KH105_crtIBY1   | 241 | ILKWPVIFLGASPNGAPALYSMMTYGGHALGTFYPTGGLARPVVAIAELAKD | LGVDIQLD     |
| KH105_crtIBY2   | 241 | ILKWPVIFLGASPNGAPALYSMMTYGGHALGTYIPTGGLARPVVAIAELAKD | LGVDIQLD     |
| Brevundimonas   | 1   | -----                                                | -----        |
| Xanthophyllomyc | 1   | -----                                                | MTAFAAYYQIHL |
| Arabidopsis     | 1   | -----                                                | -----        |
| Haematococcus   | 1   | -----                                                | -----        |
| Thalassiosira   | 1   | -----                                                | -----        |
| Ectocarpus      | 1   | -----                                                | -----        |
| Chlamydomonas   | 1   | -----                                                | -----        |
| Synechococcus   | 1   | -----                                                | -----        |
| Haliscomenobact | 1   | -----                                                | -----        |
| Pedobacter      | 1   | -----                                                | -----        |
| Fulvivirga      | 1   | -----                                                | -----        |
| Haloquadratum   | 1   | -----                                                | -----        |
| Natrinema       | 1   | -----                                                | -----        |
| Cyclobacterium  | 1   | -----                                                | -----        |

|                 |     |                           |                                   |                           |                                   |
|-----------------|-----|---------------------------|-----------------------------------|---------------------------|-----------------------------------|
| KH105_crtIBY1   | 301 | AEVTSFRFDETGRGVQAVCTRNDRC | EAVDGVVAAADYHHVEQTLLPPELRRYEQGFWD | AEVTSFRFDETGRGVQAVCTRNDRC | EAVDGVVAAADYHHVEQTLLPPELRRYEQGFWD |
| KH105_crtIBY2   | 301 | AEVTSFRFDETGRGVQAVCTRNDRC | EAVDGVVAAADYHHVEQTLLPPELRRYEQGFWD | AEVTSFRFDETGRGVQAVCTRNDRC | EAVDGVVAAADYHHVEQTLLPPELRRYEQGFWD |
| Brevundimonas   | 1   | -----                     | -----                             | -----                     | -----                             |
| Xanthophyllomyc | 12  | IYTLPI                    | LGLLTSPI                          | LTKFDIYKISILVFI           | AFSATT                            |
| Arabidopsis     | 1   | -----                     | -----                             | -----                     | -----                             |
| Haematococcus   | 1   | -----                     | -----                             | -----                     | -----                             |
| Thalassiosira   | 1   | -----                     | -----                             | -----                     | -----                             |
| Ectocarpus      | 1   | -----                     | -----                             | -----                     | -----                             |
| Chlamydomonas   | 1   | -----                     | -----                             | -----                     | -----                             |
| Synechococcus   | 1   | -----                     | -----                             | -----                     | -----                             |
| Haliscomenobact | 1   | -----                     | -----                             | -----                     | -----                             |
| Pedobacter      | 1   | -----                     | -----                             | -----                     | -----                             |
| Fulvivirga      | 1   | -----                     | -----                             | -----                     | -----                             |
| Haloquadratum   | 1   | -----                     | -----                             | -----                     | -----                             |
| Natrinema       | 1   | -----                     | -----                             | -----                     | -----                             |
| Cyclobacterium  | 1   | -----                     | -----                             | -----                     | -----                             |

|                 |     |            |                      |                 |                 |
|-----------------|-----|------------|----------------------|-----------------|-----------------|
| KH105_crtIBY1   | 361 | VMSPSCVLFY | LGFDHRIQGLTHHTFFFDRD | DAHLHAAFDTHTWAE | EPVFYVSATSKTDP  |
| KH105_crtIBY2   | 361 | VMSPSCVLFY | LGFDHRIQGLTHHTFFFDRD | DAHLHAAFDTHTWAE | EPVFYVSATSKTDP  |
| Brevundimonas   | 1   | -----      | -----                | -----           | -----           |
| Xanthophyllomyc | 72  | VFGTFLDVPY | EEYAFFVIQT           | VITGLVYVLATRH   | LPSLALPKTRSSALS |
| Arabidopsis     | 1   | -----      | -----                | -----           | -----           |
| Haematococcus   | 1   | -----      | -----                | -----           | -----           |
| Thalassiosira   | 1   | -----      | -----                | -----           | -----           |
| Ectocarpus      | 1   | -----      | -----                | -----           | -----           |
| Chlamydomonas   | 1   | -----      | -----                | -----           | -----           |
| Synechococcus   | 1   | -----      | -----                | -----           | -----           |
| Haliscomenobact | 1   | -----      | -----                | -----           | -----           |
| Pedobacter      | 1   | -----      | -----                | -----           | -----           |
| Fulvivirga      | 1   | -----      | -----                | -----           | -----           |
| Haloquadratum   | 1   | -----      | -----                | -----           | -----           |
| Natrinema       | 1   | -----      | -----                | -----           | -----           |
| Cyclobacterium  | 1   | -----      | -----                | -----           | -----           |

|                 |     |                  |                     |               |                          |
|-----------------|-----|------------------|---------------------|---------------|--------------------------|
| KH105_crtIBY1   | 421 | SVVTGQGEALFV     | LVPI                | SYQLNGTDNAA   | REQILHTVLT               |
| KH105_crtIBY2   | 421 | SVVSGQGEALFV     | LVPI                | SYQLNGTDNAA   | REHILHTVLT               |
| Brevundimonas   | 1   | -----            | -----               | -----         | -----                    |
| Xanthophyllomyc | 132 | IYLF             | TAHPSPSPDPLVTDHYFYM | RALSLLITPPTML | LAALSGEYAFDWKSGRAKSTIAAI |
| Arabidopsis     | 41  | QRLNKGKKKQIPTWSS | SFVRNR              | RRIGVVS       | SSLVASPSGEIALSSEEKVNVLK  |
| Haematococcus   | 26  | PGRCRPHSSRCP     | VAISATLVGPDPRWSIASS | -QVVPKQPQ     | LKGKDV                   |
| Thalassiosira   | 41  | TKRRDGSILMSAV    | SQKSSSSSSSGQGR      | TTKEISNE      | ALGVTL                   |
| Ectocarpus      | 37  | GRGRRWALLAAATTL  | AMP                 | PCARGFALAPQAD | VRPSRATGASGSGGGGGRYFGR   |
| Chlamydomonas   | 13  | PARGR            | ---                 | RMAVARATLLRPO | SNVSSSAPS                |
| Synechococcus   | 1   | -----            | -----               | -----         | -----                    |
| Haliscomenobact | 1   | -----            | -----               | -----         | -----                    |
| Pedobacter      | 1   | -----            | -----               | -----         | -----                    |
| Fulvivirga      | 1   | -----            | -----               | -----         | -----                    |
| Haloquadratum   | 1   | -----            | -----               | -----         | -----                    |
| Natrinema       | 1   | -----            | -----               | -----         | -----                    |
| Cyclobacterium  | 1   | -----            | -----               | -----         | -----                    |

|                 |     |                                                                                                                            |
|-----------------|-----|----------------------------------------------------------------------------------------------------------------------------|
| KH105_crtIBY1   | 481 | TDFERDFHSFRGN <b>A</b> FGHANTLSQSLV <b>L</b> KPSMD <b>S</b> LLNNLVFAGHLTNPGPGVPP <b>S</b> IVSGTV                           |
| KH105_crtIBY2   | 481 | TDFERDFHSFRGN <b>A</b> FGHANTLSQSLV <b>L</b> KPSMD <b>S</b> LLNNLVFAGHLTNPGPGVPP <b>S</b> IVSGTV                           |
| Brevundimonas   | 1   | -----                                                                                                                      |
| Xanthophyllomyc | 192 | MIPTVYLIWVDYV <b>A</b> V <b>G</b> QDSWSINDEKIV <b>G</b> WRLGGVLPIEE <b>A</b> MFLLTNLMIVLGLSACDH                            |
| Arabidopsis     | 96  | -----                                                                                                                      |
| Haematococcus   | 78  | -----                                                                                                                      |
| Thalassiosira   | 101 | AEIALADSRKK <b>Y</b> E <b>A</b> S <b>G</b> ATISPNPGGR <b>L</b> M <b>G</b> INDEVVAEV <b>G</b> YEIGFAEEYLDK <b>E</b> SGETVDE |
| Ectocarpus      | 97  | TLSASELN <b>V</b> NNNN <b>N</b> NNNNNANGVAAVRR <b>S</b> GRGAGGYVARGGG <b>G</b> ASSALCMSAASTGT <b>A</b> AND                 |
| Chlamydomonas   | 62  | -----                                                                                                                      |
| Synechococcus   | 1   | -----                                                                                                                      |
| Haliscomenobact | 1   | -----                                                                                                                      |
| Pedobacter      | 1   | -----                                                                                                                      |
| Fulvivirga      | 1   | -----                                                                                                                      |
| Haloquadratum   | 1   | -----                                                                                                                      |
| Natrinema       | 1   | -----                                                                                                                      |
| Cyclobacterium  | 1   | -----                                                                                                                      |

|                 |     |             |           |             |           |        |         |       |        |        |
|-----------------|-----|-------------|-----------|-------------|-----------|--------|---------|-------|--------|--------|
| KH105_crtIBY1   | 601 | YFAAATLMKPM | AFLDTAAMY | GLFRVADDYVD | ---       | NVGD   | AGERQRL | DAFM  | ADFWR  | CWESG  |
| KH105_crtIBY2   | 601 | YFAAATLMKPM | AFLDTAAMY | GLFRVADDYVD | ---       | NVGD   | AGERQRL | DAFM  | ADFWR  | CWESG  |
| Brevundimonas   | 20  | FAAAARLFPA  | AI        | RDDAWMFY    | AWCRH     | CDDEID | GQVLG   | EGAV  | GIDPVL | AGRKL  |
| Xanthophyllomyc | 312 | FFVASAGFP   | SEVRER    | LVGLYAF     | CRVTD     | DLIDS  | PEVSS   | NP    | HATID  | MVSD   |
| Aradidopsis     | 146 | FYLGT       | LM        | TPERR       | KAIWAIY   | VWCRRT | DELVD   | ---   | GP     | NAN    |
| Haematococcus   | 120 | FYLGT       | LM        | TP          | IQAKSI    | WAIY   | VWCRRT  | DELVD | ---    | GP     |
| Thalassiosira   | 218 | FYLGT       | QVL       | PEPS        | MKAIWAIY  | VWCRRT | DEIVD   | ---   | AP     | RP     |
| Ectocarpus      | 209 | FYLGT       | KFMSP     | VARKA       | VWAIY     | VWCRRT | DDIVD   | ---   | GP     | RAM    |
| Chlamydomonas   | 102 | FYLGT       | LM        | TPAQ        | AKAVWAIY  | VWCRRT | DELVD   | ---   | GP     | NAN    |
| Synechococcus   | 27  | FYLGT       | LM        | LLPPA       | KRRAIWAIY | VWCRRT | DELM    | ---   | SP     | EA     |
| Haliscomenobact | 24  | F           | SMG       | I           | KVFDKAY   | RASII  | YAIY    | G     | FVRF   | ADEIVD |
| Pedobacter      | 24  | F           | SLGI      | H           | FLNKKL    | RHPIY  | YAIY    | G     | FVRL   | ADEIVD |
| Fulvivirga      | 24  | F           | SLGI      | Y           | CLNKD     | IRDPIY | SIY     | G     | FVRF   | ADEIVD |
| Haloquadratum   | 21  | F           | HLA       | T           | RVLPERV   | RHATY  | VLY     | A     | FFRV   | ADEIVD |
| Natrinema       | 20  | F           | YLAT      | R           | FLPERV    | RHATY  | VLY     | A     | FFRI   | ADEIVD |
| Cyclobacterium  | 27  | F           | TLGI      | K           | ITLCKK    | LHMP   | IYGIY   | G     | VRY    | ADEIVD |

**Cyclobacterium** 85 **LSMNLVLEH**

|                 |     |         |         |       |          |          |          |        |      |       |          |       |        |     |     |      |    |        |        |        |    |     |   |     |    |    |    |     |   |     |   |   |   |   |   |   |   |   |   |   |   |   |   |   |   |   |   |
|-----------------|-----|---------|---------|-------|----------|----------|----------|--------|------|-------|----------|-------|--------|-----|-----|------|----|--------|--------|--------|----|-----|---|-----|----|----|----|-----|---|-----|---|---|---|---|---|---|---|---|---|---|---|---|---|---|---|---|---|
| KH105_crtIBY1   | 678 | A-YPREL | FERFFRS | MRMDA | KRK----- | VVCL     | TMDD     | TMEY   | MEGS | AAVIG | EFM      | LPIL  |        |     |     |      |    |        |        |        |    |     |   |     |    |    |    |     |   |     |   |   |   |   |   |   |   |   |   |   |   |   |   |   |   |   |   |
| KH105_crtIBY2   | 678 | A-YPREL | FERFFRS | MRMDA | KRK----- | VVCL     | TMDD     | TMEY   | MEGS | AAVIG | EFM      | LPIL  |        |     |     |      |    |        |        |        |    |     |   |     |    |    |    |     |   |     |   |   |   |   |   |   |   |   |   |   |   |   |   |   |   |   |   |
| Brevudimonas    | 102 | A-IPAE  | EAMD    | LLOG  | FEMD     | VEG----- | RRYD     | TLED   | TDY  | AYH   | VAG      | VGVMM | ARIM   |     |     |      |    |        |        |        |    |     |   |     |    |    |    |     |   |     |   |   |   |   |   |   |   |   |   |   |   |   |   |   |   |   |   |
| Xanthophyllomyc | 432 | GLIPRY  | PLDE    | LLRG  | YTTDL    | I        | FPL      | STE    | AVQ  | ARK   | TP       | IE    | TTAD   | LLD | YGL | CVAG | SV | AE     | LL     | VYVS   |    |     |   |     |    |    |    |     |   |     |   |   |   |   |   |   |   |   |   |   |   |   |   |   |   |   |   |
| Arabidopsis     | 219 | P-VDI   | QPF     | FRDM  | IE       | GMR      | DLK----- | KS     | RY   | QNF   | DDL      | YL    | YCY    | VAG | T   | VGL  | MS | VP     | V      |        |    |     |   |     |    |    |    |     |   |     |   |   |   |   |   |   |   |   |   |   |   |   |   |   |   |   |   |
| Haematococcus   | 193 | P-MDI   | QPF     | KDM   | IE       | GMR      | DLH----- | K      | TRY  | QTF   | DEL      | Y     | EY     | CY  | R   | VAG  | T  | VGL    | M      | T      | MP | V   |   |     |    |    |    |     |   |     |   |   |   |   |   |   |   |   |   |   |   |   |   |   |   |   |   |
| Thalassiosira   | 297 | PTLP    | ITP     | FS    | DM       | IR       | GML      | MD     | I    | P     | GLG----- | O     | ERY    | DT  | W   | DEL  | H  | L      | Y      | CY     | R  | VAG | T | VGL | M  | S  | MP | V   | F |     |   |   |   |   |   |   |   |   |   |   |   |   |   |   |   |   |   |
| Ectocarpus      | 286 | PSLP    | IA      | PF    | KDM      | ID       | GMI      | MD     | V    | P     | GIG----- | K     | NR     | Y   | QTF | EEL  | E  | L      | Y      | CY     | R  | VAG | T | VGL | M  | V  | LP | IL  |   |     |   |   |   |   |   |   |   |   |   |   |   |   |   |   |   |   |   |
| Chlamydomonas   | 175 | P-LHI   | QPF     | FRDM  | IE       | GMR      | MDL      | V----- | K    | S     | RY       | ET    | F      | DEL | Y   | EY   | CY | R      | VAG    | T      | V  | AL  | M | C   | MP | I  | M  |     |   |     |   |   |   |   |   |   |   |   |   |   |   |   |   |   |   |   |   |
| Synechococcus   | 104 | P-QDI   | QPY     | LD    | MI       | E        | G        | Q      | R    | M     | D        | L     | T----- | W   | TR  | Y    | P  | R      | F      | D      | D  | L   | K | L   | Y  | CY | R  | VAG | T | VGL | M | T | Q | G | V |   |   |   |   |   |   |   |   |   |   |   |   |
| Haliscomenobact | 97  | K-I     | E       | R     | E        | L        | I        | D      | A    | F     | L        | S     | M      | E   | M   | D    | L  | H----- | H      | H      | Q  | Y   | E | D   | H  | L  | Y  | Q   | E | Y   | I | G | S | A | E | V | V | G | L | M | C | L | R | V | W |   |   |
| Pedobacter      | 97  | H-I     | D       | R     | E        | L        | I        | E      | L    | F     | L        | K     | S      | M   | E   | M    | D  | L      | N----- | E      | Q  | E   | Y | T   | P  | O  | L  | Y   | D | E   | Y | I | L | G | S | A | O | V | V | G | L | M | C | L | R | V | F |
| Fulvivirga      | 97  | E-V     | D       | L     | E        | L        | I        | D      | H    | F     | L        | K     | S      | M   | E   | M    | D  | L      | K----- | K      | V  | R   | Y | D   | I  | N  | S  | F   | N | T   | Y | I | G | S | A | E | V | V | G | L | M | C | L | K | V | F |   |
| Haloquadratum   | 94  | E-I     | P       | N     | E        | D        | V        | N      | V    | F     | I        | D     | A      | M   | L   | A    | D  | V      | D      | T----- | D  | O   | Y | E   | T  | Y  | D  | D   | L | E   | T | Y | M | D | G | S | A | A | A | V | G | R | M | T | A | I | M |
| Natrinema       | 93  | G-I     | D       | D     | E        | I        | N        | T      | F    | I     | D        | A     | M      | A   | T   | D    | I  | E      | T----- | S      | R  | Y   | E | T   | Y  | A  | D  | L   | E | S   | Y | M | R | G | S | A | S | V | G | V | M | T | A | I | M |   |   |
| Cyclobacterium  | 100 | H-I     | E       | R     | D        | L        | I        | D      | A    | F     | L        | S     | M      | A   | M   | D    | L  | D----- | F      | A      | T  | Y   | N | D   | S  | K  | Y  | K   | E | Y   | I | G | S | A | E | V | V | G | L | M | C | L | R | V | F |   |   |

|                 |     |      |   |   |     |     |   |   |   |   |   |        |     |     |     |     |     |   |   |   |   |   |   |   |   |   |   |   |   |   |   |   |   |   |   |   |   |   |   |   |   |   |   |   |   |   |   |   |   |   |   |   |   |   |   |   |   |   |   |   |   |
|-----------------|-----|------|---|---|-----|-----|---|---|---|---|---|--------|-----|-----|-----|-----|-----|---|---|---|---|---|---|---|---|---|---|---|---|---|---|---|---|---|---|---|---|---|---|---|---|---|---|---|---|---|---|---|---|---|---|---|---|---|---|---|---|---|---|---|---|
| KH105_crtIBY1   | 727 | MPDR | D | S | L   | A   | F | K | Q | A | I | P----- | H   | A   | R   | D   | L   | G | L | A | F | Q | I | T | N | M | L | R | D | I | G | E | D | N | R | - | L | G | R | Q | Y | I | P | V | D | A | C | N | R | H | G | L |   |   |   |   |   |   |   |   |   |
| KH105_crtIBY2   | 727 | MPDR | D | S | L   | A   | F | K | Q | A | I | P----- | H   | A   | R   | D   | L   | G | L | A | F | Q | I | T | N | M | L | R | D | I | G | E | D | N | R | - | L | G | R | Q | Y | I | P | V | D | A | C | N | R | H | G | L |   |   |   |   |   |   |   |   |   |
| Brevudimonas    | 150 | G    | V | Q | --- | --- | D | A | P | T | L | R      | --- | --- | A   | O   | D   | L | G | L | A | F | O | L | T | N | I | A | R | D | V | E | D | A | K | - | G | G | R | V | L | P | G | Q | W | L | D | E | A | G | V |   |   |   |   |   |   |   |   |   |   |
| Xanthophyllomyc | 492 | W    | A | S | A   | P   | S | Q | V | P | A | T      | I   | E   | E   | R   | E   | A | V | L | V | A | S | R | E | M | G | T | A | L | Q | L | V | N | I | A | R | D | I | K | G | D | A | T | - | E | G | R | F | Y | L | P | L | S | F | F | G | L | R | D | E |
| Arabidopsis     | 267 | G    | I | D | P   | K   | S | K | A | T | T | E      | S   | --- | --- | V   | Y   | N | A | A | L | A | L | G | I | A | N | Q | L | T | N | I | L | R | D | V | G | E | D | A | R | - | R | G | R | V | Y | L | P | O | D | E | L | A | O | A | G | L |   |   |   |
| Haematococcus   | 241 | G    | I | D | P   | S   | Y | K | G | P | M | D      | V   | --- | --- | V   | Y   | K | A | A | L | A | L | G | T | A | N | Q | L | T | N | I | L | R | D | V | G | E | D | A | R | E | R | N | R | I | Y | L | P | M | E | D | L | O | O | F | G | L |   |   |   |
| Thalassiosira   | 349 | G    | C | A | E   | G   | Y | T | D | E | V | A      | K   | --- | --- | E   | P   | A | L | S | L | G | V | A | F | Q | I | T | N | I | L | R | D | V | G | E | D | A | E | K | R | E | R | V | Y | L | P | O | R | D | M | E | R | F | G | V |   |   |   |   |   |
| Ectocarpus      | 338 | G    | T | A | E   | G   | V | S | E | E | D | A      | K   | --- | --- | F   | P   | A | L | S | L | G | I | A | L | Q | L | T | N | I | L | R | D | V | G | E | D | A | V | - | R | G | R | I | Y | L | P | L | E | D | L | E | K | F | G | V |   |   |   |   |   |
| Chlamydomonas   | 223 | G    | I | E | P   | T   | Y | K | G | O | L | E      | P   | --- | --- | V   | Y   | R | A | A | L | A | L | G | T | A | N | Q | L | T | N | I | L | R | D | V | G | E | D | A | Y | O | R | N | R | I | Y | L | P | L | E | D | L | K | Y | G | I |   |   |   |   |
| Synechococcus   | 152 | G    | V | D | G   | A   | Y | T | S | A | P | W      | S   | D   | R   | P   | -   | D | T | S | D | A | A | V | A | L | G | I | A | N | Q | L | T | N | I | L | R | D | V | G | E | D | R | G | - | R | G | R | I | Y | L | P | L | E | D | L | E | R | F | G | V |
| Haliscomenobact | 144 | T    | N | G | -   | D   | E | Q | Q | Y | Q | N      | L   | K   | A   | --- | --- | P | A | R | S | L | G | S | A | F | Q | K | I | N | F | L | R | D | M | K | S | D | F | D | E | R | G | R | V | Y | F | P | G | V | D | F | R | N | F | S | E |   |   |   |   |
| Pedobacter      | 144 | T    | E | G | -   | N   | E | Q | Q | Y | Q | L      | L   | K   | P   | --- | --- | S | A | M | M | L | G | S | A | F | Q | K | V | N | F | L | R | D | L | N | A | D | Y | K | N | L | S | R | T | Y | F | P | N | V | D | L | R | A | F | S | N |   |   |   |   |
| Fulvivirga      | 144 | C    | N | G | -   | D   | K | T | Y | E | H | L      | K   | P   | --- | --- | Y   | A | R | K | L | G | S | A | F | Q | K | I | N | F | L | R | D | L | R | E | D | Y | V | H | M | G | R | S | Y | F | P | D | V | D | I | R | V | F | D | E |   |   |   |   |   |
| Haloquadratum   | 142 | D    | T | E | --- | --- | N | A | E | T | A | L      | P   | --- | --- | H   | A   | T | A | L | G | E | A | F | Q | M | S | N | F | L | R | D | V | G | E | D | V | K | E | R | D | R | V | Y | L | P | O | E | T | L | R | O | Y | D | V |   |   |   |   |   |   |
| Natrinema       | 141 | E    | P | D | --- | --- | A | E | D | V | A | I      | P   | --- | --- | H   | A   | V | T | L | G | E | A | F | Q | M | T | N | F | L | R | D | V | E | D | I | R | E | R | D | R | I | Y | L | P | O | E | T | L | R | N | H | G | V |   |   |   |   |   |   |   |
| Cyclobacterium  | 147 | C    | E | G | -   | D   | Q | G | N | Y | E | H      | L   | K   | H   | --- | --- | A | A | C | K | L | G | S | A | F | Q | K | V | N | F | L | R | D | L | K | S | D | Y | E | D | R | G | R | V | Y | F | P | G | V | D | F | N | S | F | D | S |   |   |   |   |

|                 |     |   |       |       |     |     |   |   |     |     |       |       |     |     |   |   |   |   |   |   |   |   |   |   |   |   |   |   |   |   |   |   |   |   |   |   |   |   |   |   |   |   |   |   |   |   |   |   |   |   |   |   |   |   |   |   |   |   |   |   |
|-----------------|-----|---|-------|-------|-----|-----|---|---|-----|-----|-------|-------|-----|-----|---|---|---|---|---|---|---|---|---|---|---|---|---|---|---|---|---|---|---|---|---|---|---|---|---|---|---|---|---|---|---|---|---|---|---|---|---|---|---|---|---|---|---|---|---|---|
| KH105_crtIBY1   | 780 | N | ----- | G     | K   | L   | T | S | H   | E   | O     | P     | G   | F   | R | E | L | M | E | E | M | F | A | F | T | D | N | L | Y | A | S | A | D | L | G | I | D | M | L | P | E | Q | V | R | D | V | I | R | V | A | R | L | A |   |   |   |   |   |   |   |
| KH105_crtIBY2   | 780 | N | ----- | G     | K   | L   | T | S | H   | E   | O     | P     | G   | F   | R | E | L | M | E | E | M | F | A | F | T | D | N | L | Y | A | S | A | D | L | G | I | D | M | L | P | E | Q | V | R | D | V | I | R | V | A | R | L | A |   |   |   |   |   |   |   |
| Brevudimonas    | 198 | P | R     | D     | --- | --- | O | V | D   | Q   | P     | R     | H   | R   | Q | A | V | A | H | T | A | Q | R | L | V | A | A | E | P | Y | A | S | A | R | G | L | I | D | L | N | P | S | A | W | A | V | A | T | A | R | G | V |   |   |   |   |   |   |   |   |
| Xanthophyllomyc | 551 | S | K     | L     | A   | I   | P | T | D   | W   | T     | E     | P   | R   | P | O | D | F | D | K | L | S | L | S | P | S | T | L | P | S | S | N | A | S | E | S | F | R | E | W | K | T | S | L | E | L | V | A | Y | A | E | D | L | A | K | H | S |   |   |   |
| Arabidopsis     | 321 | S | D     | E     | D   | I   | F | A | --- | --- | G     | K     | V   | T   | D | K | W | R | N | F | M | K | M | O | L | K | R | A | R | M | F | F | D | E | A | E | K | G | V | T | E | L | S | A | A | S | R | W | P | V | W | A | S | L | L | L |   |   |   |   |
| Haematococcus   | 296 | T | E     | Q     | D   | V   | L | G | A   | V   | H     | V     | P   | S   | O | G | K | V | S | E | K | W | R | A | F | M | K | F | Q | I | A | R | A | R | Q | C | F | A | D | E | S | G | V | D | O | L | E | A | K | A | R | W | P | V | W | S | A | L | I | L |
| Thalassiosira   | 402 | T | E     | R     | Q   | I   | F | D | --- | --- | K     | V     | D   | E   | N | Y | I | N | L | M | K | F | E | I | A | R | A | R | M | Y | A | R | A | L | R | G | V | P | M | L | R | P | E | S | R | L | P | V | O | L | S | L | D | A |   |   |   |   |   |   |
| Ectocarpus      | 390 | D | P     | E     | N   | I   | M | N | --- | --- | G     | I     | L   | D   | S | N | Y | K | E | L | M | R | Y | Q | I | A | R | A | R | F | Y | Y | K | O | A | A | R | G | I | P | M | L | S | P | E | G | R | L | P | V | Q | A | S | L | D | M |   |   |   |   |
| Chlamydomonas   | 278 | S | E     | K     | E   | L   | L | T | G   | L   | H     | A     | P   | T   | G | A | M | D | D | R | W | R | N | F | M | H | F | Q | I | T | R | A | R | Q | Y | F | T | D | A | E | G | G | V | D | L | L | A | P | A | R | W | P | V | W | S | A | L | I | L |   |
| Synechococcus   | 210 | S | E     | D     | D   | L   | M | A | --- | --- | G     | R     | L   | S   | A | W | C | E | L | M | O | F | O | L | K | R | A | R | D | W | F | A | R | S | E | A | G | V | R | W | L | S | R | D | A | R | W | P | V | W | T | S | L | R | L |   |   |   |   |   |
| Haliscomenobact | 197 | E | ----- | D     | K   | L   | K | I | E   | S   | D     | ----- | --- | --- | I | K | A | D | F | D | H | A | Y | T | G | I | V | O | L | P | K | G | V | R | F | G | V | Y | L | A | Y | V | Y |   |   |   |   |   |   |   |   |   |   |   |   |   |   |   |   |   |
| Pedobacter      | 197 | V | ----- | E     | K   | O   | L | I | E   | V   | E     | ----- | --- | --- | I | E | A | E | F | K | E | A | L | A | G | I | K | O | L | P | S | S | S | R | S | G | V | Y | L | A | Y | I | Y |   |   |   |   |   |   |   |   |   |   |   |   |   |   |   |   |   |
| Fulvivirga      | 197 | N | ----- | T     | K   | O   | K | I | E   | S   | ----- | ---   | --- | I   | E | E | D | F | R | I | A | F | E | G | I | R | K | L | P | K | C | A | R | F | G | V | Y | L | S | Y | V |   |   |   |   |   |   |   |   |   |   |   |   |   |   |   |   |   |   |   |
| Haloquadratum   | 192 | S | T     | ----- | A   | O   | I | L | N   | L   | E     | F     | D   | E   | N | V | R | A | V | I | O | H | E | O | Q | R | T | E | A | L | Y | R | E | G | V | K | G | I | O | Y | L | P | E | D | C | O | L | A | V | L | L | A | A | V | L |   |   |   |   |   |
| Natrinema       | 191 | D | P     | ----- | A   | O   | I | E | R   | L   | E     | Y     | S   | E   | S | F | A | G | A | M | A | E | L | K | R | T | E | E | L | Y | R | E | G | V | A | G | I | R | Y | L | P | E | D | C | O | L | A | V | L | L | A | A | V | L |   |   |   |   |   |   |
| Cyclobacterium  | 20  |   |       |       |     |     |   |   |     |     |       |       |     |     |   |   |   |   |   |   |   |   |   |   |   |   |   |   |   |   |   |   |   |   |   |   |   |   |   |   |   |   |   |   |   |   |   |   |   |   |   |   |   |   |   |   |   |   |   |   |

|                 |     |                                                             |
|-----------------|-----|-------------------------------------------------------------|
| KH105_crtIBY1   | 890 | HIAFVWIGAVWASWLEWPGCSYLRFHGLFVVPPLMLARLAHQRAVADKQVPFLRRAGFW |
| KH105_crtIBY2   | 890 | HIAFVWIGAVWASWLEWPGCSYLRFHGLFVIPPLLLARLAHQRAVADKQVPFLRRAGFW |
| Brevundimonas   | 310 | I-----                                                      |
| Xanthophyllomyc | 671 | EGQ-----                                                    |
| Arabidopsis     |     | -----                                                       |
| Haematococcus   |     | -----                                                       |
| Thalassiosira   | 514 | EKSLEQMLENKWVEQRGSSATSDYLQSLNK-----                         |
| Ectocarpus      | 496 | KLTRFDKLEMERESFPAGEDDDQF-----                               |
| Chlamydomonas   |     | -----                                                       |
| Synechococcus   |     | -----                                                       |
| Haliscomenobact |     | -----                                                       |
| Pedobacter      |     | -----                                                       |
| Fulvivirga      |     | -----                                                       |
| Haloquadratum   | 304 | YDDVDETDSDARHDRPNRGWSIGTEFVTQRFSNLVRHFTRGE-----             |
| Natrinema       | 299 | -----TADHDHRRH--PEHGDGVPTRS-----                            |
| Cyclobacterium  |     | -----                                                       |

|                 |     |                                                              |
|-----------------|-----|--------------------------------------------------------------|
| KH105_crtIBY1   | 950 | TLALCVVATLYTTPWDNFLVYRRVWGYPPERILFVIGYVPVEEYMFFTLETMLVAAVWLQ |
| KH105_crtIBY2   | 950 | TLALCVVATLYTTPWDNFLVYRRVWGYPPERILFVIGYVPIEEYMFFTLETMLVAAVWLQ |
| Brevundimonas   |     | -----                                                        |
| Xanthophyllomyc |     | -----                                                        |
| Arabidopsis     |     | -----                                                        |
| Haematococcus   |     | -----                                                        |
| Thalassiosira   |     | -----                                                        |
| Ectocarpus      |     | -----                                                        |
| Chlamydomonas   |     | -----                                                        |
| Synechococcus   |     | -----                                                        |
| Haliscomenobact |     | -----                                                        |
| Pedobacter      |     | -----                                                        |
| Fulvivirga      |     | -----                                                        |
| Haloquadratum   |     | -----                                                        |
| Natrinema       |     | -----                                                        |
| Cyclobacterium  |     | -----                                                        |

|                 |      |                                                              |
|-----------------|------|--------------------------------------------------------------|
| KH105_crtIBY1   | 1010 | VFQPTTLQAEVGPGRGKGMVLVASLGLVWIAGLSCLASEQSLYIGLILTWAMPVLILQWS |
| KH105_crtIBY2   | 1010 | VFQPTTLQAEVGPGRGKGMVLVASLGLVWMAGLSCLASEQSLYIGLILTWAMPVLILQWS |
| Brevundimonas   |      | -----                                                        |
| Xanthophyllomyc |      | -----                                                        |
| Arabidopsis     |      | -----                                                        |
| Haematococcus   |      | -----                                                        |
| Thalassiosira   |      | -----                                                        |
| Ectocarpus      |      | -----                                                        |
| Chlamydomonas   |      | -----                                                        |
| Synechococcus   |      | -----                                                        |
| Haliscomenobact |      | -----                                                        |
| Pedobacter      |      | -----                                                        |
| Fulvivirga      |      | -----                                                        |
| Haloquadratum   |      | -----                                                        |
| Natrinema       |      | -----                                                        |
| Cyclobacterium  |      | -----                                                        |

|                 |      |                                                              |
|-----------------|------|--------------------------------------------------------------|
| KH105_crtIBY1   | 1070 | LGAHVLTTHAKPVLTTIVSATAYLCVADAWAIRHGIWRINPANLVLPNGKYALPLEEALF |
| KH105_crtIBY2   | 1070 | LGAHVLTTHAKPVLKTIVSATAYLCVADAWAIRHGIWRINPANLVLPNGKHALPLEEALF |
| Brevundimonas   |      | -----                                                        |
| Xanthophyllomyc |      | -----                                                        |
| Arabidopsis     |      | -----                                                        |
| Haematococcus   |      | -----                                                        |
| Thalassiosira   |      | -----                                                        |
| Ectocarpus      |      | -----                                                        |
| Chlamydomonas   |      | -----                                                        |
| Synechococcus   |      | -----                                                        |
| Haliscomenobact |      | -----                                                        |
| Pedobacter      |      | -----                                                        |
| Fulvivirga      |      | -----                                                        |
| Haloquadratum   |      | -----                                                        |
| Natrinema       |      | -----                                                        |
| Cyclobacterium  |      | -----                                                        |

|                 |      |                                          |                      |
|-----------------|------|------------------------------------------|----------------------|
| KH105_crtIBY1   | 1130 | FLVTSIMCTWGLTLAMVLWGKPIGLAVGVGTWARPPRPGR | TQLITCGAVLVLSISHPALF |
| KH105_crtIBY2   | 1130 | FLVTSIMCTWGLTLAMVLWGKPIGLAVGMGTWARPPRPGR | SQLITCGAVLVLSISHPALF |
| Brevundimonas   |      | -----                                    | -----                |
| Xanthophyllomyc |      | -----                                    | -----                |
| Arabidopsis     |      | -----                                    | -----                |
| Haematococcus   |      | -----                                    | -----                |
| Thalassiosira   |      | -----                                    | -----                |
| Ectocarpus      |      | -----                                    | -----                |
| Chlamydomonas   |      | -----                                    | -----                |
| Synechococcus   |      | -----                                    | -----                |
| Haliscomenobact |      | -----                                    | -----                |
| Pedobacter      |      | -----                                    | -----                |
| Fulvivirga      |      | -----                                    | -----                |
| Haloquadratum   |      | -----                                    | -----                |
| Natrinema       |      | -----                                    | -----                |
| Cyclobacterium  |      | -----                                    | -----                |

|                 |      |                                    |                            |
|-----------------|------|------------------------------------|----------------------------|
| KH105_crtIBY1   | 1190 | KMVPALVVTIMRFGFWACALMAGVHLPARGRVLF | AAAVVAISCAPAALAPLLAGTVLVGT |
| KH105_crtIBY2   | 1190 | KMVPALVVTIMRFGFWACALMAGVHLPARGRVLF | VAAVVAISCAPAALAPLLAGTVLVGT |
| Brevundimonas   |      | -----                              | -----                      |
| Xanthophyllomyc |      | -----                              | -----                      |
| Arabidopsis     |      | -----                              | -----                      |
| Haematococcus   |      | -----                              | -----                      |
| Thalassiosira   |      | -----                              | -----                      |
| Ectocarpus      |      | -----                              | -----                      |
| Chlamydomonas   |      | -----                              | -----                      |
| Synechococcus   |      | -----                              | -----                      |
| Haliscomenobact |      | -----                              | -----                      |
| Pedobacter      |      | -----                              | -----                      |
| Fulvivirga      |      | -----                              | -----                      |
| Haloquadratum   |      | -----                              | -----                      |
| Natrinema       |      | -----                              | -----                      |
| Cyclobacterium  |      | -----                              | -----                      |

|                 |      |                     |
|-----------------|------|---------------------|
| KH105_crtIBY1   | 1250 | LGGWHTRDRDDTLPLYKNA |
| KH105_crtIBY2   | 1250 | LGGWHTRDREDTLPLYKNA |
| Brevundimonas   |      | -----               |
| Xanthophyllomyc |      | -----               |
| Arabidopsis     |      | -----               |
| Haematococcus   |      | -----               |
| Thalassiosira   |      | -----               |
| Ectocarpus      |      | -----               |
| Chlamydomonas   |      | -----               |
| Synechococcus   |      | -----               |
| Haliscomenobact |      | -----               |
| Pedobacter      |      | -----               |
| Fulvivirga      |      | -----               |
| Haloquadratum   |      | -----               |
| Natrinema       |      | -----               |
| Cyclobacterium  |      | -----               |
