# Supplementary material for: A Possible Trifunctional β-Carotene Synthase Gene Identified in the Draft Genome of Aurantiochytrium sp. Strain KH105
Source: MDPI journal article supplement (doi:10.3390/genes9040200), 2018-04-09
Supplement: s1 [file s1]

Table S4. List of genes involved in carotenoid biosynthesis characterized by genome decoding and transcriptome analysis of *Aurantiochytrium* sp. KH105.

| Gene                                     | EC number      | Normalized Gene Expression<br>(log <sub>10</sub> (FPKM+1)) |                              |                              |                              |
|------------------------------------------|----------------|------------------------------------------------------------|------------------------------|------------------------------|------------------------------|
|                                          |                | 28°C,<br>27 hrs <sup>1</sup>                               | 28°C,<br>40 hrs <sup>2</sup> | 28°C,<br>48 hrs <sup>3</sup> | 16°C,<br>48 hrs <sup>1</sup> |
| Hexokinase                               | 2.7.1.1        | 1.818                                                      | 1.684                        | 1.351                        | 1.774                        |
| ADP-dependent glucokinase                | 2.7.1.147      | 0.668                                                      | 0.590                        | 0.684                        | 0.730                        |
| Glucose-6-phosphate isomerase            | 5.3.1.9        | 2.068                                                      | 2.188                        | 1.917                        | 2.018                        |
| 6-Phosphofructokinase                    | 2.7.1.11       | 2.010                                                      | 2.018                        | 1.631                        | 1.840                        |
| Fructose biphosphate aldolase            | 4.1.2.13       | 2.434                                                      | 2.447                        | 1.886                        | 2.213                        |
| Triosephosphate isomerase                | 5.3.1.1.00001  | 2.828                                                      | 2.714                        | 2.555                        | 2.640                        |
|                                          | 5.3.1.1.000225 | 2.211                                                      | 2.172                        | 1.888                        | 2.456                        |
| Glyceraldehyde-3-phosphate dehydrogenase | 1.2.1.12       | 2.618                                                      | 2.397                        | 2.430                        | 2.435                        |
| Phosphoglycerate kinase                  | 2.7.2.3        | 1.981                                                      | 1.962                        | 1.495                        | 1.812                        |
| Phosphoglycerate mutase                  | 5.4.2.1        | 1.653                                                      | 1.616                        | 1.446                        | 1.518                        |
| Phosphopyruvate hydratase                | 4.2.1.11       | 2.225                                                      | 2.140                        | 1.930                        | 2.104                        |
| Pyruvate kinase                          | 2.7.1.40       | 2.234                                                      | 2.288                        | 1.841                        | 2.264                        |
| Pyruvate dehydrogenase E1 $\alpha$       | 1.2.4.1        | 2.197                                                      | 2.185                        | 2.057                        | 2.318                        |
| Pyruvate dehydrogenase E1 $\beta$        | 1.2.4.1        | 1.841                                                      | 1.745                        | 1.544                        | 1.790                        |
| Pyruvate dehydrogenase E2                | 2.3.1.12       | 1.570                                                      | 1.500                        | 1.237                        | 1.497                        |
| Dihydrolipoamide dehydrogenase           | 1.8.1.4        | 1.810                                                      | 1.738                        | 1.524                        | 1.560                        |
| Acetyl-CoA acetyltransferase             | 2.3.1.9        | 1.683                                                      | 1.113                        | 1.231                        | 1.362                        |

|                                            |             |       |       |       |       |
|--------------------------------------------|-------------|-------|-------|-------|-------|
| HMG-CoA synthase                           | 2.3.3.10    | 2.314 | 1.584 | 0.722 | 1.245 |
| HMG-CoA reductase                          | 1.1.1.34    | 1.772 | 1.537 | 0.752 | 1.376 |
| Mevalonate kinase                          | 2.7.1.36    | 2.247 | 1.918 | 1.194 | 1.939 |
| Phosphomevalonate kinase                   | 2.7.4.2     | 1.066 | 0.764 | 0.609 | 0.641 |
| Diphosphomevalonate decarboxylase          | 4.1.1.33    | 1.931 | 1.619 | 0.905 | 1.641 |
| Isopentenyl diphosphate isomerase          | 5.3.3.2     | 1.251 | 1.027 | 0.917 | 1.264 |
| Geranyl diphosphate synthase               | 2.5.1.1     | 2.053 | 2.051 | 2.093 | 2.002 |
| Farnesyl diphosphate synthase              | 2.5.1.10    | 2.123 | 1.806 | 1.097 | 1.809 |
| Squalene synthase <sup>4</sup>             | 2.5.1.21    | 1.097 | 1.010 | 0.384 | 0.769 |
| Geranylgeranyl diphosphate synthase (CrtE) | 2.5.1.29    | 2.134 | 2.420 | 2.484 | 2.074 |
| β-carotene synthase (CrtI <sup>BY</sup> )  |             | 0.960 | 1.035 | 1.181 | 0.937 |
| β-carotene ketolase (CrtO)                 |             | 0.526 | 0.806 | 1.021 | 0.539 |
| β-carotene 3-hydroxylase (CrtZ)            | 1.14.13.129 | 0.241 | 0.000 | 1.037 | 0.000 |

<sup>1</sup> Mid-log Phase

<sup>2</sup> Late-log to Stationary Phase

<sup>3</sup> Starvation Phase

<sup>4</sup> Squalene synthase is not directly involved in the carotenoid biosynthesis but affect the supply of farnesyl diphosphate.
