# Supplementary material for: A Possible Trifunctional β-Carotene Synthase Gene Identified in the Draft Genome of Aurantiochytrium sp. Strain KH105
Source: MDPI journal article supplement (doi:10.3390/genes9040200), 2018-04-09
Supplement: s1 [file s1]

**Supplementary Table S3: Statistics of the completeness of genomes based on 248 core eukaryotic genes (CEGs)**

|                                  | number of 248<br>ultra-conserved<br>CEGs present<br>in genome | % 248<br>ultra-conserved<br>CEGs present | total number of<br>CEGs | average<br>number of<br>orthologs per<br>CEG | % detected<br>CEGs that<br>have more than<br>1 ortholog |
|----------------------------------|---------------------------------------------------------------|------------------------------------------|-------------------------|----------------------------------------------|---------------------------------------------------------|
| <i>Aurantiocytrium</i> sp. KH105 | 225                                                           | 90.73                                    | 504                     | 2.24                                         | 95.56                                                   |
| <i>Phytophthora infestans</i>    | 230                                                           | 92.74                                    | 287                     | 1.25                                         | 22.61                                                   |
| <i>Phytophthora ramorum</i>      | 229                                                           | 92.34                                    | 271                     | 1.18                                         | 15.72                                                   |
| <i>Phytophthora sojae</i>        | 232                                                           | 93.55                                    | 282                     | 1.22                                         | 18.10                                                   |
| <i>Saccharomyces cerevisiae</i>  |                                                               |                                          |                         | 1.10 ± 0.35                                  | 8.8                                                     |
| <i>Schizosaccharomyces pombe</i> |                                                               |                                          |                         | 1.11 ± 0.39                                  | 8.8                                                     |
