# Supplementary material for: A Possible Trifunctional β-Carotene Synthase Gene Identified in the Draft Genome of Aurantiochytrium sp. Strain KH105
Source: MDPI journal article supplement (doi:10.3390/genes9040200), 2018-04-09
Supplement: s1 [file s1]

|                 |   |                                                                |
|-----------------|---|----------------------------------------------------------------|
| KH105_crtIBY1   | 1 | MARRASRPVAAVVVVVLVVVASACCWQAAADVADAQGARGPGRES DGDRAKKRIAVLGAGY |
| KH105_crtIBY2   | 1 | MARRASRLVAAIVVVVLVVVAPACCRQAAADVADAQGARGPGQESDGGRAKKRIAVLGAGY  |
| Brevundimonas   | 1 | -----                                                          |
| Xanthophyllomyc | 1 | -----                                                          |
| Arabidopsis     | 1 | -----                                                          |
| Haematococcus   | 1 | -----                                                          |
| Thalassiosira   | 1 | -----                                                          |
| Ectocarpus      | 1 | -----                                                          |
| Chlamydomonas   | 1 | -----                                                          |
| Synechococcus   | 1 | -----                                                          |
| Haloquadratum   | 1 | -----                                                          |
| Natrinema       | 1 | -----                                                          |
| Phycomyces      | 1 | -----                                                          |
| Sporisorium     | 1 | -----                                                          |
| Ustilago        | 1 | -----                                                          |

|                 |    |                                                               |
|-----------------|----|---------------------------------------------------------------|
| KH105_crtIBY1   | 61 | AGLSAACELSR LGHEVVVLEKNDYVGGRAHQFEVEADNGQTFKFDAGPSWYWMPEVFDRF |
| KH105_crtIBY2   | 61 | AGLSAACELSR LGHEVVVLEKNDYVGGRAHQFEVEADNGQTFKFDAGPSWYWMPEVFDRF |
| Brevundimonas   | 1  | -----                                                         |
| Xanthophyllomyc | 1  | -----                                                         |
| Arabidopsis     | 1  | -----                                                         |
| Haematococcus   | 1  | -----                                                         |
| Thalassiosira   | 1  | -----                                                         |
| Ectocarpus      | 1  | -----                                                         |
| Chlamydomonas   | 1  | -----                                                         |
| Synechococcus   | 1  | -----                                                         |
| Haloquadratum   | 1  | -----                                                         |
| Natrinema       | 1  | -----                                                         |
| Phycomyces      | 1  | -----                                                         |
| Sporisorium     | 1  | -----                                                         |
| Ustilago        | 1  | -----                                                         |

|                 |     |                                                               |
|-----------------|-----|---------------------------------------------------------------|
| KH105_crtIBY1   | 121 | FARYGRTVQEFYQLERLDPAYRIIRNDHNGEGTVDVP GASSEAFMSWARQMNGDARLVDR |
| KH105_crtIBY2   | 121 | FARYGRTVQEFYQLERLDPAYRIIRNDHNGEGTVDVP GASSEAFMSWARQMNGDARLVDR |
| Brevundimonas   | 1   | -----                                                         |
| Xanthophyllomyc | 1   | -----                                                         |
| Arabidopsis     | 1   | -----                                                         |
| Haematococcus   | 1   | -----                                                         |
| Thalassiosira   | 1   | -----                                                         |
| Ectocarpus      | 1   | -----                                                         |
| Chlamydomonas   | 1   | -----                                                         |
| Synechococcus   | 1   | -----                                                         |
| Haloquadratum   | 1   | -----                                                         |
| Natrinema       | 1   | -----                                                         |
| Phycomyces      | 1   | -----                                                         |
| Sporisorium     | 1   | -----                                                         |
| Ustilago        | 1   | -----                                                         |

|                 |     |                                                               |
|-----------------|-----|---------------------------------------------------------------|
| KH105_crtIBY1   | 181 | LMDEAKAKYE EGVFKWIWHPMVSWWEMIDLNLVRAALQYDMFNSFVAHLQKYISSDTLLM |
| KH105_crtIBY2   | 181 | LMDEAKAKYE EGVFKWIWHPMVSWWEMIDLNLVRAALQYDMFNSFVAHLQKYISSDTLLM |
| Brevundimonas   | 1   | -----                                                         |
| Xanthophyllomyc | 1   | -----                                                         |
| Arabidopsis     | 1   | -----                                                         |
| Haematococcus   | 1   | -----                                                         |
| Thalassiosira   | 1   | -----                                                         |
| Ectocarpus      | 1   | -----                                                         |
| Chlamydomonas   | 1   | -----                                                         |
| Synechococcus   | 1   | -----                                                         |
| Haloquadratum   | 1   | -----                                                         |
| Natrinema       | 1   | -----                                                         |
| Phycomyces      | 1   | -----                                                         |
| Sporisorium     | 1   | -----                                                         |
| Ustilago        | 1   | -----                                                         |

**Supplementary Figure S7:** Alignment of CrtY1 and CrtIY2 amino acids within CrtKH105\_CrtIBY1 and CrtKH105\_CrtIBY2 with those of other eukaryotes.

|                 |     |                                                              |
|-----------------|-----|--------------------------------------------------------------|
| KH105_crtIBY1   | 241 | ILKWPVIFLGASPNGAPALYSMMTYGGHALGTFYPTGGLARPVVAIAELAKDLGVDIQLD |
| KH105_crtIBY2   | 241 | ILKWPVIFLGASPNGAPALYSMMTYGGHALGTYIPTGGLARPVVAIAELAKDLGVDIQLD |
| Brevundimonas   | 1   | -----                                                        |
| Xanthophyllomyc | 1   | -----                                                        |
| Arabidopsis     | 1   | -----                                                        |
| Haematococcus   | 1   | -----                                                        |
| Thalassiosira   | 1   | -----                                                        |
| Ectocarpus      | 1   | -----                                                        |
| Chlamydomonas   | 1   | -----                                                        |
| Synechococcus   | 1   | -----                                                        |
| Haloquadratum   | 1   | -----                                                        |
| Natrinema       | 1   | -----                                                        |
| Phycomyces      | 1   | -----                                                        |
| Sporisorium     | 1   | -----                                                        |
| Ustilago        | 1   | -----                                                        |

|                 |     |                                                              |
|-----------------|-----|--------------------------------------------------------------|
| KH105_crtIBY1   | 301 | AEVTSFRFDETGRGVQAVCTRNRCEAVDGVVAAADYHHVEQTLLPPELRRYEQGFWDAAQ |
| KH105_crtIBY2   | 301 | AEVTSFRFDETGRGVQAVCTRNRCEAVDGVVAAADYHHVEQTLLPPDLRRYEQGFWDAAQ |
| Brevundimonas   | 1   | -----                                                        |
| Xanthophyllomyc | 1   | -----                                                        |
| Arabidopsis     | 1   | -----                                                        |
| Haematococcus   | 1   | -----                                                        |
| Thalassiosira   | 1   | -----                                                        |
| Ectocarpus      | 1   | -----                                                        |
| Chlamydomonas   | 1   | -----                                                        |
| Synechococcus   | 1   | -----                                                        |
| Haloquadratum   | 1   | -----                                                        |
| Natrinema       | 1   | -----                                                        |
| Phycomyces      | 1   | -----                                                        |
| Sporisorium     | 1   | -----                                                        |
| Ustilago        | 1   | -----                                                        |

|                 |     |                                                              |
|-----------------|-----|--------------------------------------------------------------|
| KH105_crtIBY1   | 361 | VMSPSCVLFYLGFDHRIQGLTHHTFFFDRDLDAHLHAAFDTHTWAEPPVFYVSATSKTDP |
| KH105_crtIBY2   | 361 | VMSPSCVLFYLGFDHRIQGLTHHTFFFDRDLDAHLHAAFDTHTWAEPPVFYVSATSKTDP |
| Brevundimonas   | 1   | -----                                                        |
| Xanthophyllomyc | 1   | -----                                                        |
| Arabidopsis     | 1   | -----                                                        |
| Haematococcus   | 1   | -----                                                        |
| Thalassiosira   | 1   | -----                                                        |
| Ectocarpus      | 1   | -----                                                        |
| Chlamydomonas   | 1   | -----                                                        |
| Synechococcus   | 1   | -----                                                        |
| Haloquadratum   | 1   | -----                                                        |
| Natrinema       | 1   | -----                                                        |
| Phycomyces      | 1   | -----                                                        |
| Sporisorium     | 1   | -----                                                        |
| Ustilago        | 1   | -----                                                        |

|                 |     |                                                               |
|-----------------|-----|---------------------------------------------------------------|
| KH105_crtIBY1   | 421 | SVVTGQGEALFVLVPISYQLNGTDNAARREQILHTVLTRMEENLKQPLREWLVIYQKSYGT |
| KH105_crtIBY2   | 421 | SVVSGQGEALFVLVPISYQLNGTDNAARREHILHTVLTRMEENLKQPLREWLVIYQKSYGT |
| Brevundimonas   | 1   | -----                                                         |
| Xanthophyllomyc | 1   | -----                                                         |
| Arabidopsis     | 1   | -----                                                         |
| Haematococcus   | 1   | -----                                                         |
| Thalassiosira   | 1   | -----                                                         |
| Ectocarpus      | 1   | -----                                                         |
| Chlamydomonas   | 1   | -----                                                         |
| Synechococcus   | 1   | -----                                                         |
| Haloquadratum   | 1   | -----                                                         |
| Natrinema       | 1   | -----                                                         |
| Phycomyces      | 1   | -----                                                         |
| Sporisorium     | 1   | -----                                                         |
| Ustilago        | 1   | -----                                                         |

|                 |     |                                                               |
|-----------------|-----|---------------------------------------------------------------|
| KH105_crtIBY1   | 481 | TDFERDFHSFRGNAFGHANTLSQSLVLKPSMDSLLNNLVFAGHLTNPGPGVPPSIIVSGTV |
| KH105_crtIBY2   | 481 | TDFERDFHSFRGNAFGHANTLSQSLVLKPSMDSLLNNLVFAGHLTNPGPGVPPSIIVSGTV |
| Brevundimonas   | 1   | -----                                                         |
| Xanthophyllomyc | 1   | -----                                                         |
| Arabidopsis     | 1   | -----                                                         |
| Haematococcus   | 1   | -----                                                         |
| Thalassiosira   | 1   | -----                                                         |
| Ectocarpus      | 1   | -----                                                         |
| Chlamydomonas   | 1   | -----                                                         |
| Synechococcus   | 1   | -----                                                         |
| Haloquadratum   | 1   | -----                                                         |
| Natrinema       | 1   | -----                                                         |
| Phycomyces      | 1   | -----                                                         |
| Sporisorium     | 1   | -----                                                         |
| Ustilago        | 1   | -----                                                         |

|                 |     |                                                               |
|-----------------|-----|---------------------------------------------------------------|
| KH105_crtIBY1   | 541 | SANLLHDKLQVTANHHLLGFTLLGALLGALFLGILTLSVFSTRFVSIVECIRLLYVHGRT  |
| KH105_crtIBY2   | 541 | SANLLHDKLQVTANHHSLGFALLGALLGALFLGILALS VFSTRFVSIVECIRLLYVHGRT |
| Brevundimonas   | 1   | -----                                                         |
| Xanthophyllomyc | 1   | -----                                                         |
| Arabidopsis     | 1   | -----                                                         |
| Haematococcus   | 1   | -----                                                         |
| Thalassiosira   | 1   | -----                                                         |
| Ectocarpus      | 1   | -----                                                         |
| Chlamydomonas   | 1   | -----                                                         |
| Synechococcus   | 1   | -----                                                         |
| Haloquadratum   | 1   | -----                                                         |
| Natrinema       | 1   | -----                                                         |
| Phycomyces      | 1   | -----                                                         |
| Sporisorium     | 1   | -----                                                         |
| Ustilago        | 1   | -----                                                         |

|                 |     |                                                                 |
|-----------------|-----|-----------------------------------------------------------------|
| KH105_crtIBY1   | 601 | YFAAATLMKPMAFLDTAAMYGLFRVADDYVDNVGDAGERQORNLD AFMADFWRWCWESGRGD |
| KH105_crtIBY2   | 601 | YFAAATLMKPMAFLDTAAMYGLFRVADDYVDNVGDAGERQORNLD AFMADFWRWCWESGRGD |
| Brevundimonas   | 1   | -----                                                           |
| Xanthophyllomyc | 1   | -----                                                           |
| Arabidopsis     | 1   | -----                                                           |
| Haematococcus   | 1   | -----                                                           |
| Thalassiosira   | 1   | -----                                                           |
| Ectocarpus      | 1   | -----                                                           |
| Chlamydomonas   | 1   | -----                                                           |
| Synechococcus   | 1   | -----                                                           |
| Haloquadratum   | 1   | -----                                                           |
| Natrinema       | 1   | -----                                                           |
| Phycomyces      | 1   | -----                                                           |
| Sporisorium     | 1   | -----                                                           |
| Ustilago        | 1   | -----                                                           |

|                 |     |                                                            |
|-----------------|-----|------------------------------------------------------------|
| KH105_crtIBY1   | 661 | YARHPTLPAlIESAHRRAYPRELFFFRSMRMDAKRKVVCLTMDDTMEYMEGSAAVIGE |
| KH105_crtIBY2   | 661 | YARHPTLPAlIESAHRRAYPRELFFFRSMRMDAKRKVVCLTMDDTMEYMEGSAAVIGE |
| Brevundimonas   | 1   | -----                                                      |
| Xanthophyllomyc | 1   | -----                                                      |
| Arabidopsis     | 1   | -----                                                      |
| Haematococcus   | 1   | -----                                                      |
| Thalassiosira   | 1   | -----                                                      |
| Ectocarpus      | 1   | -----                                                      |
| Chlamydomonas   | 1   | -----                                                      |
| Synechococcus   | 1   | -----                                                      |
| Haloquadratum   | 1   | -----                                                      |
| Natrinema       | 1   | -----                                                      |
| Phycomyces      | 1   | -----                                                      |
| Sporisorium     | 1   | -----                                                      |
| Ustilago        | 1   | -----                                                      |

|                 |     |                                                              |
|-----------------|-----|--------------------------------------------------------------|
| KH105_crtIBY1   | 721 | FMLPILMPDRDSLAFKQAIPHARDLGLAFQITNMLRDIGEDNRLGRQYIPVDACNRHGLN |
| KH105_crtIBY2   | 721 | FMLPILMPDRDSLAFKQAIPHARDLGLAFQITNMLRDIGEDNRLGRQYIPVDACKRHGLN |
| Brevundimonas   | 1   | -----                                                        |
| Xanthophyllomyc | 1   | -----                                                        |
| Arabidopsis     | 1   | -----                                                        |
| Haematococcus   | 1   | -----RTFLSQTAIMLSPLQRLCAVPG                                  |
| Thalassiosira   | 1   | -----MVAVN                                                   |
| Ectocarpus      | 1   | -----                                                        |
| Chlamydomonas   | 1   | -----MMLKAGNRPVALRS                                          |
| Synechococcus   | 1   | -----                                                        |
| Haloquadratum   | 1   | -----                                                        |
| Natrinema       | 1   | -----                                                        |
| Phycomyces      | 1   | -----                                                        |
| Sporisorium     | 1   | -----                                                        |
| Ustilago        | 1   | -----                                                        |

|                 |     |                                                                                                                                                           |
|-----------------|-----|-----------------------------------------------------------------------------------------------------------------------------------------------------------|
| KH105_crtIBY1   | 781 | GKLTSEQPGFRELMEEMFAFTDNL <sup>Y</sup> ASADL <sup>G</sup> IDMLPEQVRDVIR <sup>V</sup> ARLAYHRIHDKIRA                                                        |
| KH105_crtIBY2   | 781 | GKLTSEQPGFRELMEEMFAFTDNL <sup>Y</sup> ASADL <sup>G</sup> IDMLPEQVRDVIR <sup>V</sup> ARLAYHRIHDKIRA                                                        |
| Brevundimonas   | 1   | -----                                                                                                                                                     |
| Xanthophyllomyc | 1   | -----                                                                                                                                                     |
| Arabidopsis     | 1   | -----                                                                                                                                                     |
| Haematococcus   | 23  | SSYSAGTALVLLPPAPRV <sup>V</sup> CLSR <sup>Q</sup> HEOTTOWPRRRLV <sup>R</sup> ASAATASEQPARSS <sup>S</sup> PSGYIM <sup>R</sup> RD                           |
| Thalassiosira   | 6   | PLHAVALAVLPSAAYAFV <sup>V</sup> SPTPVV <sup>L</sup> SP <sup>S</sup> SARVTPLS <sup>G</sup> APYCTSYR <sup>V</sup> RHSHSF <sup>P</sup> TTTSIQ <sup>S</sup> R |
| Ectocarpus      | 1   | -----MAFDMGEMME <sup>Q</sup> FMNSVSGG <sup>G</sup> GK <sup>T</sup> GGGGG <sup>E</sup> NGKRV <sup>V</sup> Y-----                                           |
| Chlamydomonas   | 15  | GRSAT-----VSPISR <sup>V</sup> VSRP <sup>Q</sup> QL <sup>R</sup> ORRICT--AAAG <sup>Q</sup> KDAFPSPGYPIPPGE <sup>V</sup> VGHFY <sup>R</sup> E               |
| Synechococcus   | 1   | -----                                                                                                                                                     |
| Haloquadratum   | 1   | -----                                                                                                                                                     |
| Natrinema       | 1   | -----                                                                                                                                                     |
| Phycomyces      | 1   | -----                                                                                                                                                     |
| Sporisorium     | 1   | -----                                                                                                                                                     |
| Ustilago        | 1   | -----                                                                                                                                                     |

|                 |     |                                                                                                                                                          |
|-----------------|-----|----------------------------------------------------------------------------------------------------------------------------------------------------------|
| KH105_crtIBY1   | 841 | ANYDIFTARRRV <sup>P</sup> PLREKL <sup>T</sup> ILVD <sup>T</sup> VPRL <sup>K</sup> KLARIALTELICA <sup>A</sup> LYGLSRPHIAF <sup>V</sup> WIGAV <sup>W</sup> |
| KH105_crtIBY2   | 841 | ANYDIFTARRRV <sup>P</sup> PLREKL <sup>T</sup> ILVD <sup>T</sup> VPRL <sup>K</sup> KLARIALTELICA <sup>A</sup> LYGLSRPHIAF <sup>V</sup> WIGAV <sup>W</sup> |
| Brevundimonas   | 1   | -----MQAAAPDSSAPD <sup>L</sup> LLLGGLANGLIAL <sup>R</sup> ISQVRPELDVRIVE <sup>A</sup> ADRL <sup>G</sup>                                                  |
| Xanthophyllomyc | 1   | -----                                                                                                                                                    |
| Arabidopsis     | 1   | -----                                                                                                                                                    |
| Haematococcus   | 83  | PMPWPTASDIALTOHDLQATPEVD <sup>L</sup> IVAGAG <sup>G</sup> PSGIAVA <sup>A</sup> ERVA <sup>A</sup> AGFS----VCV <sup>V</sup> DPE <sup>P</sup> PL            |
| Thalassiosira   | 66  | TTSSTIFASASN <sup>E</sup> TLTPTSQD <sup>T</sup> CDVLVLG <sup>S</sup> GPAARSIATLLSSKANDKAYDVLLADSN <sup>Y</sup> D                                         |
| Ectocarpus      | 37  | -----DAAIVGYGPAGGV <sup>M</sup> ATLLAEKHG----LKVC <sup>I</sup> IDPN <sup>L</sup> E                                                                       |
| Chlamydomonas   | 67  | TEKWPTSETVR <sup>L</sup> QPHDLNEVD <sup>Y</sup> VDL <sup>V</sup> VAGAG <sup>P</sup> PAGVAVASRVAAAGFS----VCV <sup>V</sup> DPE <sup>P</sup> PL             |
| Synechococcus   | 1   | -----MAEPVDVLVLG <sup>G</sup> GPAALCIASELN <sup>Q</sup> WGVAVG----CIA <sup>P</sup> DPV <sup>D</sup>                                                      |
| Haloquadratum   | 1   | -----                                                                                                                                                    |
| Natrinema       | 1   | -----MPGE <sup>V</sup> PAGDRSNRPRSS <sup>V</sup> PIVPN <sup>Q</sup> YGHGA <sup>I</sup> IRL <sup>P</sup> SVLPFTA <sup>V</sup> VAART <sup>P</sup> TAH      |
| Phycomyces      | 1   | -----                                                                                                                                                    |
| Sporisorium     | 1   | -----MTRL <sup>Y</sup> Q <sup>P</sup>                                                                                                                    |
| Ustilago        | 1   | -----MTSL <sup>D</sup> EP                                                                                                                                |

|                 |     |                                                                                                                                    |
|-----------------|-----|------------------------------------------------------------------------------------------------------------------------------------|
| KH105_crtIBY1   | 901 | ASWLEWPGCSY <sup>L</sup> RFHGLFV <sup>P</sup> -----PLLMLARLAHQRAVADKQVPFLRRAGFWT                                                   |
| KH105_crtIBY2   | 901 | ASWLEWPGCSY <sup>L</sup> RFHGLFV <sup>P</sup> -----PLLMLARLAHQRAVADKQVPFLRRAGFWT                                                   |
| Brevundimonas   | 49  | G--IHTWSFFEADLT <sup>P</sup> AQRAWIAP-----LIACRWPGYSV <sup>R</sup> FP-----AFERR <sup>L</sup> VT                                    |
| Xanthophyllomyc | 1   | -----MTALAY <sup>Y</sup> QIH <sup>L</sup> IY <sup>T</sup> LP-----ILGLLGLL <sup>T</sup> S-----PILTK <sup>F</sup> DIY <sup>K</sup> I |
| Arabidopsis     | 1   | -----MDLL-----DCLDTTWSGAVV <sup>Y</sup> VDEG-----VKD <sup>L</sup> LSR                                                              |
| Haematococcus   | 139 | GIWPNNYGAWVDEFEAMGLG-----EYMEIVWPKASVHLSNKP-----EGEK <sup>F</sup> LSR                                                              |
| Thalassiosira   | 126 | RRWAPNYGVWQDEWQSICK <sup>L</sup> YESFNQPIGNEVIDRLWMSTDCFFGGSF <sup>D</sup> IAAEQRMRLDR                                             |
| Ectocarpus      | 71  | KRWIPNYGVWVEEWEALDK--DLQIGLG-DCLDR <sup>T</sup> WEV <sup>T</sup> DSFEGGSHGT <sup>P</sup> ADERCRID <sup>R</sup>                     |
| Chlamydomonas   | 123 | AHWPNNYG <sup>V</sup> WLDEFQAMGLE-----DCLHVIWPKAK <sup>V</sup> WLNSEA-----DGEK <sup>F</sup> LN <sup>R</sup>                        |
| Synechococcus   | 40  | ASWPNTYGIWADELKMGLE-----HLEHRWSDTVS <sup>F</sup> FGAGGSTAQDQSHANGI                                                                 |
| Haloquadratum   | 1   | -----MSGLSYAGFHVLF <sup>T</sup> LP-----PLAYL <sup>F</sup> VFGT-----TPTRRRVARVGI                                                    |
| Natrinema       | 52  | VDP <sup>E</sup> MTVQFTYFGIHLAFL <sup>L</sup> P-----PILILGWLASR-----RDRAWWGS <sup>R</sup> P <sup>L</sup> SGL                       |
| Phycomyces      | 1   | -----MLTYMEVHLY <sup>F</sup> TL <sup>P</sup> -----VLALLAFLY <sup>K</sup> -----PFFT <sup>T</sup> TKDR <sup>F</sup> KY               |
| Sporisorium     | 8   | SQDW <sup>P</sup> ACTLSYRHFHLLWT <sup>L</sup> P-----LCAVL <sup>F</sup> FLVAR-----PFLTK <sup>L</sup> DRAK <sup>L</sup>              |
| Ustilago        | 8   | SQDW <sup>P</sup> ACTLSYRHFHLLWT <sup>L</sup> P-----VCGVL <sup>L</sup> VIA <sup>R</sup> -----PFLTK <sup>L</sup> DRAK <sup>L</sup>  |

|                 |     |                                      |                             |
|-----------------|-----|--------------------------------------|-----------------------------|
| KH105_crtIBY1   | 951 | LALCVVATLYTTPWDNFLVYRRVWGYPPER----   | ILFVIGYVPVEEYMFFTLETMLVAAV  |
| KH105_crtIBY2   | 951 | LALCVVATLYTTPWDNFLVYRRVWGYPPER----   | ILFVIGYVPVEEYMFFTLETMLVAAV  |
| Brevundimonas   | 93  | GVCSTAEAFEAFTQALAGRIVTGAAVS-----     | AGPTEAVLADG-----HRLTARA     |
| Xanthophyllomyc | 38  | SILVFIAFSATTPWDSWIIRNGAWTYPESAESGQGV | FGTFLDVPYEEYAFFVIQTVITGLV   |
| Arabidopsis     | 29  | PYGRVNRKQLKSKMLQKCI TNGVKFHQSKVTN--  | VVHEEANSTVVCSDG--VKIQASV    |
| Haematococcus   | 185 | PYGRVDRPRLKSMMLKKCAAHGVTFLEGKVDG--   | VNHGEGRSASVSLADG--RSIRGSL   |
| Thalassiosira   | 186 | PYCRIERDVLRRVLSP--ASECTSVNIYSPSGSMV  | HDESGETSVLIQSKDGDISOVRAKL   |
| Ectocarpus      | 127 | PYARVSRDKMQANLKSRLSAGVTKIKGKVDAKT    | LEHSADGETSVCLD--DG--QQIDCRL |
| Chlamydomonas   | 169 | PFGRVDRPKLKRILLERCVASGVTFLDKAVSG--   | VSHGGGCSAVKLA--DG--REIRGSL  |
| Synechococcus   | 90  | DYGLFDRAELQRYWLER--ADGVVWHQDTAERVD   | ATSATTSVSCVSG-----TTLOARL   |
| Haloquadratum   | 38  | ILMTVVAVIYTTTPWDNYLTIQRGVWVYGPGD---  | IFARIWKAPVGEYLFILQPILTGLW   |
| Natrinema       | 98  | GIMIVLAIIVYTTPTNRLIPGVWVYGEGT---     | VLATVWHTPLEEYLFVLOPILTALW   |
| Phycomyces      | 36  | IFLCTVAFATASPDWNIYVYHKAWSYCPEC---    | VTAVIGYVPLEEYMFIIIMTLITVTF  |
| Sporisorium     | 50  | ILLPIIAFVWTTTPWDNLIIVKNRAWFYHRHC---  | IWFTIGYVPIEEYFFFIQSLISTLW   |
| Ustilago        | 50  | ILLPIIAFVWTTTPWDNLIIVKNRAWSYHRHC---  | IWFTIGYVPIEEYFFFIQSLISTLW   |

|                 |      |                                      |                                          |
|-----------------|------|--------------------------------------|------------------------------------------|
| KH105_crtIBY1   | 1007 | WLQVFQPTTLQAEVGPGRKG-----            | GMLVLASLGLVWVAGLSCLAS-----EQSLYIGLI      |
| KH105_crtIBY2   | 1007 | WLQVFQPTTLQAEVGPGRKG-----            | GMLVLASLGLVWVAGLSCLAS-----EQSLYIGLI      |
| Brevundimonas   | 141  | VLDRGCPATAAPDLA-----                 | LGFOKFVGLEVRLTAP-----HGLKEPIVMDAC        |
| Xanthophyllomyc | 98   | VYLATRHLLPSLALPKTRSSALSALKALIPLIYLF  | TAHPSPSPDPLVTDHYFYMRAL                   |
| Arabidopsis     | 83   | VLDATGFSRCLVQYDKPYN--PGYQVAYGIVAEVD  | GH-----PFDVDMVFMDWR                      |
| Haematococcus   | 239  | VLDATGHVRKLIKFDQKFD--PGYQGAYGIVAEVES | H-----PFDLETMLFMDWR                      |
| Thalassiosira   | 243  | VVDCTGHESKIVLKDDRMKSIPPGFOIAYGILAEV  | DETSIPNNDFCGPVFKEAMTFLDYR                |
| Ectocarpus      | 183  | LVDSCSGHYSELVERVGEHN--PGVQIAYGAEVEV  | KDGH-----HAPYDENAMLFMDYR                 |
| Chlamydomonas   | 223  | VLDATGHSRRLVQYDKKFD--PGFOGAYGIVAEVES | H-----PFALDTMLFMDWR                      |
| Synechococcus   | 142  | VIDASGSRPTPHIRPDQGP--VAGQAAAYGVVGR   | FSQP-----PIEAGRFVLMDYR                   |
| Haloquadratum   | 94   | VTTLT-----PDATYRNGDFD                | RRRPRTLGA LVWLGFGITGTVL-----LTVESGFYLGAI |
| Natrinema       | 154  | LCQVRPSAERSLAIPHTHR-----             | LLGVAGGLAIAVVGVWALR-----GDTATYVLGWL      |
| Phycomyces      | 92   | TSLTMRWTLPSFFIRPETPVFQSVCVRYIPVIG    | FLTIAAKAWASS--IPDSHPFYGACI               |
| Sporisorium     | 106  | CTLLTRWALPNLYLVPSSPKRRRLAT--PAVV     | VCMLCFVLGLKAA--VPETHSYVFGMI              |
| Ustilago        | 106  | CTLLTRWTLPNLYLTPSTPARRPLAP--FAVAT    | CVVCFVLGLQAS--VPATHTYVFGMI               |

|                 |      |                                      |                                              |
|-----------------|------|--------------------------------------|----------------------------------------------|
| KH105_crtIBY1   | 1057 | LTWAMPVLI-----                       | LOWSLGAHVLTTH-----AKPVLTTIVSATAYLCVADAW      |
| KH105_crtIBY2   | 1057 | LTWAMPVLI-----                       | LOWSLGAHVLTTH-----AKPVLKTIVSATAYLCVADAW      |
| Brevundimonas   | 183  | VDQSGGYR-----                        | FLYVLPFDDR-----TLLIEDTRYTDGDDLHDHDFRTG       |
| Xanthophyllomyc | 158  | SLLITPPTM-----                       | LLAALSGEYAFDW-KSGR-----AKSTIAAIMIPTVYLWVDYV  |
| Arabidopsis     | 131  | DKHLDSY--PELKERNSKIPTFLYAMPFSSN----  | RIFLEETSLVARPGLRMEIDQER                      |
| Haematococcus   | 287  | DEHTQGN--PAMHAANNALPTFLYAMPFSSKT---- | RIFLEETSLVARPAVGFDLKER                       |
| Thalassiosira   | 303  | TDHFPEGSN--ELAKAEKAPTFFMYAMPLNGN---- | RIFFEETSLVARPALSFOECKDR                      |
| Ectocarpus      | 233  | TDYADKAELSPEEVKGLDDTPTFLYAMPMGAA     | PNGORRIFFEETSLVARPPISFDLCKER                 |
| Chlamydomonas   | 271  | DDHTQAPGL-EAMRAANTALPTFLYAMPFTKN---- | LVFLEETSLVSRPAVDFFPELKDR                     |
| Synechococcus   | 190  | CDHLSAAQR-----                       | QEPPTFLYAMDLDG-----VFFVEETSLALAPGFSYDVLKQR   |
| Haloquadratum   | 143  | LAWACPVA-----                        | LOWAVGGGY-----LTRR-----WREWSLAIAIPTVYVLWMIDS |
| Natrinema       | 202  | FLWAGPVLA-----                       | LOWGFGSTYVLWAI-----RRSLVAIAVPTLYLWLDVRI      |
| Phycomyces      | 149  | LWYVCPVLA-----                       | LLWIGSGEYMLRR-----WKAVLFSIAVPTIFLCWVDQY      |
| Sporisorium     | 161  | TWWSLPLA-----                        | LLLWGSVDFVSNMGVRAG-----LAPFALSVLAPTFLWASDVY  |
| Ustilago        | 161  | SWWSMPLA-----                        | LLLWGSIDFVRNMGVGAG-----FIPFAISVLGPTLYLWSSDIY |

|                 |      |                                    |                             |
|-----------------|------|------------------------------------|-----------------------------|
| KH105_crtIBY1   | 1100 | AIRHGIWRINPANLVLPMPGKYALPLEEA----- | LFFLVTSIMCTWGLTLAMVLWGKPIGL |
| KH105_crtIBY2   | 1100 | AIRHGIWRINPANLVLPMPGKHALPLEEA----- | LFFLVTSIMCTWGLTLAMVLWGKPIGL |
| Brevundimonas   | 224  | VRDYAAORGWVIETVLREEGVLPVALDGDIAAHL | KRLGPTALSGLRAGLFHPTTGYSILP  |
| Xanthophyllomyc | 205  | AVGQDSWSINDEKIVGWRLGGVLPLEEA-----  | MFFLLTNLMIVLGLSACDHTQALYLLH |
| Arabidopsis     | 183  | MAARLKHLGINVKRIEEDERCVIPMGGP----   | LPVLPORVVGIGGTAGMVHPSTGYMVA |
| Haematococcus   | 339  | LDARLKWLGIKVKAVEEEYCLIPMGGV----    | LPTHQORVLGIGGTAGMVHPSTGFMM  |
| Thalassiosira   | 355  | CMTRLHLGLITVTKVEEEFCYIPMGGP----    | LPAKDQRVIGFGGAAMVHPSTGYHLC  |
| Ectocarpus      | 293  | LYRRLKHHGIEVTKVMDEELCYIPMGGG----   | MPSLTORVVAFGGASGLVHAATGYMHV |
| Chlamydomonas   | 325  | LQARLQHLGIKVTNVLEEYCLIPMGGV----    | LPKHPQRVLAIGGTAGMVHPSTGFMS  |
| Synechococcus   | 237  | LQORLDORGVAITEVIHEEFCLFPMNLP----   | LPDRSQPLLAFGGAAAMVHPASGYMVG |
| Haloquadratum   | 186  | AIALGVWTTISDQYSTGINLGL-LPTEEA----- | VFFLITNLIIVYGLILFEWIIDYWYHH |
| Natrinema       | 245  | AIELGVWVISDTYTTGHALGL-LPIEEA-----  | LFFLVTLFVVGIGITMYVWVLDRI    |
| Phycomyces      | 192  | AIARGTWDISRRTSTGIMVLPSPLEEF-----   | LFFLLIDTVLVFASCATDRAHAIVHIY |
| Sporisorium     | 209  | ALRRGTWHINEATSLNVFPIPHLPTEEM----   | LFFLVTNLILVSACFTFDRCAICRQS  |
| Ustilago        | 209  | ALRRGTWHINQATSNIFFPIPDLPTEEM----   | LFFLVTNVILVSACFTFDRCAICRLS  |

|                 |      |                                                                 |                                                  |
|-----------------|------|-----------------------------------------------------------------|--------------------------------------------------|
| KH105_crtIBY1   | 1155 | AVGVG                                                           | -----                                            |
| KH105_crtIBY2   | 1155 | AVGMG                                                           | -----                                            |
| Brevundimonas   | 284  | DAVRLA                                                          | -----                                            |
| Xanthophyllomyc | 260  | GRTIYG                                                          | -----NKKMPSSFPLITPPVLSLFFSSRPYSQPKRDLELAVKLEEK   |
| Arabidopsis     | 238  | RTLAAA                                                          | -----                                            |
| Haematococcus   | 394  | RMLGAV                                                          | -----                                            |
| Thalassiosira   | 410  | RAMMGA                                                          | -----                                            |
| Ectocarpus      | 348  | RMLAAS                                                          | -----                                            |
| Chlamydomonas   | 380  | RMMGAA                                                          | -----                                            |
| Synechococcus   | 292  | SLLRRG                                                          | -----                                            |
| Haloquadratum   | 240  | PDAIG                                                           | -----                                            |
| Natrinema       | 299  | SAWTS                                                           | -----                                            |
| Phycomyces      | 247  | ITPMN                                                           | -----HNKVSTWYMDFFYLCWAFLOTDOALSGETLSDLDATWRILREA |
| Sporisorium     | 264  | VAENAPPLSPSYLPLGSLDITYTKLWAAFVRSRDRPPVATSAASASVEPRDLAASLQVLRRAA |                                                  |
| Ustilago        | 264  | APDHQPPLSPSYLPLGSLATYTKLWAAFVRSRDRSSLPTSCASASVEPQDLSASLQVLRRAA  |                                                  |

|                 |      |                                                               |                                       |
|-----------------|------|---------------------------------------------------------------|---------------------------------------|
| KH105_crtIBY1   | 1160 | -----                                                         | -----TWARPPRPGRTOITCGAVLVLSISHP       |
| KH105_crtIBY2   | 1160 | -----                                                         | -----TWARPPRPGRSOLITCGAVLVLSISHP      |
| Brevundimonas   | 290  | --DHLAERIEAAPDGP                                              | -----ALAQVIRRHARDVWAQRGFYRLNRML       |
| Xanthophyllomyc | 309  | SRSFFVASAGFSEVRERIVGLYAFCRVTDDLIDSPEVSSNPAT-IDMVSDFLTLLFGP    |                                       |
| Arabidopsis     | 244  | --PIVANATVRYLGSP                                              | -----SSNSLRGDQLSAEVWRDLWPIERRRQREFFCF |
| Haematococcus   | 400  | --PTIADAIVDQLSAPADKAT-SLAARKPGSEAEAEAMSAAVWRAAWPVERIRQRLFNTF  |                                       |
| Thalassiosira   | 416  | --GEVAKVIREELEEK                                              | -----NWNPDRAAAR-AYNAIWSPTTIAQRNFAVF   |
| Ectocarpus      | 354  | --GAVSRAIAAEKKD                                               | -----GPGTSEAAARRAYOALWPSKAKLQORDFHVF  |
| Chlamydomonas   | 386  | --PTVADTIVDQLSRPADKASESGAPLRPSSEAEAESMAAAVWAATWPLERVQRRAFFT   |                                       |
| Synechococcus   | 298  | --PDLAKALAEALANR                                              | -----NLGSAALAQRGWOALWPIELVLRHOLYQF    |
| Haloquadratum   | 245  | -----                                                         | -----PEVSR                            |
| Natrinema       | 304  | -----                                                         | -----TAPRVPTSSDDR                     |
| Phycomyces      | 295  | SASFYTASSVFSFEARODLGVLYGFCRATDDLADNNDVSVPDRKKQLELVRGFVROMFDS  |                                       |
| Sporisorium     | 324  | SKSFNAASLLLEWDLRTDLGCLYAFCRVADDLVDDDAQGLEAKSSNLDVIRAIIVDAIYAD |                                       |
| Ustilago        | 324  | SKSFNAASLLLEWDLRTDLGCLYAFCRVADDLVDDHAQELQAKAKNLDVVRDIVDAVYAD  |                                       |

|                 |       |                                                             |                      |
|-----------------|-------|-------------------------------------------------------------|----------------------|
| KH105_crtIBY1   | 1187  | -----                                                       | -----                |
| KH105_crtIBY2   | 1187  | -----                                                       | -----                |
| Brevundimonas   | 331   | FR                                                          | -----                |
| Xanthophyllomyc | 368   | PLHPSQPKILSSPLLPPSHPSRPTGMYPLPPPPSLSPAELVQFLTERVPVQYHFAFRLL |                      |
| Arabidopsis     | 290   | G                                                           | -----                |
| Haematococcus   | 457   | G                                                           | -----                |
| Thalassiosira   | 459   | G                                                           | -----                |
| Ectocarpus      | 398   | G                                                           | -----                |
| Chlamydomonas   | 444   | G                                                           | -----                |
| Synechococcus   | 341   | G                                                           | -----                |
| Haloquadratum   | 250   | -----                                                       | -----                |
| Natrinema       | ----- | -----                                                       | -----                |
| Phycomyces      | 355   | K-----HGHPDIDWTOYS-----                                     | -----GSI PDSFIAAFRSF |
| Sporisorium     | 384   | SPEAAPQKQPSAQPVSDRIRTLAPVALP-----                           | -----DKVKQDTRAAAASI  |
| Ustilago        | 384   | S--IVDRKQHLSTPIGERLRILLASAALS-----                          | -----DKIKQDTRAAATSI  |

|                 |       |                                                              |                              |
|-----------------|-------|--------------------------------------------------------------|------------------------------|
| KH105_crtIBY1   | 1187  | -----                                                        | -----                        |
| KH105_crtIBY2   | 1187  | -----                                                        | -----                        |
| Brevundimonas   | 333   | -----                                                        | -----                        |
| Xanthophyllomyc | 428   | AKLOGLIPRYPLDELLRGYTTDLIFPLSTEAVQARKTPIETTADLLDYGLCVAGSVAELL |                              |
| Arabidopsis     | 291   | -----                                                        | -----                        |
| Haematococcus   | 458   | -----                                                        | -----                        |
| Thalassiosira   | 460   | -----                                                        | -----                        |
| Ectocarpus      | 399   | -----                                                        | -----                        |
| Chlamydomonas   | 445   | -----                                                        | -----                        |
| Synechococcus   | 342   | -----                                                        | -----                        |
| Haloquadratum   | 250   | -----                                                        | -----                        |
| Natrinema       | ----- | -----                                                        | -----                        |
| Phycomyces      | 382   | TRLRDVLEIKAVEELLDGYTFDLEORE-----                             | -----VKNEDDL VYYSACVASSVGEMC |
| Sporisorium     | 427   | APLTRYIPKRLWYEMLOGYSLDLLFEHPDAD--KRTRLRTMDDLVEYSQCVAGVVGEMC  |                              |
| Ustilago        | 425   | APLTQYIPKRLWYEMLOGYSADLRFQHDAR--QRTLRLQSMDDLVEYSQCVAGVVGEMC  |                              |

|                 |      |                                                              |
|-----------------|------|--------------------------------------------------------------|
| KH105_crtIBY1   | 1187 | -----                                                        |
| KH105_crtIBY2   | 1187 | -----                                                        |
| Brevundimonas   | 333  | -----                                                        |
| Xanthophyllomyc | 488  | VYVSWASAPSQVPATIEEREAVLVA-----SREMG                          |
| Arabidopsis     | 291  | -----MDI                                                     |
| Haematococcus   | 458  | -----MEL                                                     |
| Thalassiosira   | 460  | -----GEF                                                     |
| Ectocarpus      | 399  | -----GEF                                                     |
| Chlamydomonas   | 445  | -----MDV                                                     |
| Synechococcus   | 342  | -----LGR                                                     |
| Haloquadratum   | 250  | -----                                                        |
| Natrinema       |      | -----                                                        |
| Phycomyces      | 431  | TRVLMGSEPGGNRTMLKWTVER-----ARDMG                             |
| Sporisorium     | 484  | TRVILG--RCGGAVPLELKVDRTIAPVSTK--AAMAGKALDLTRADDVHALLYEARRMG  |
| Ustilago        | 482  | IRVILG--RCGSTVPLDLEVDRKIALRASKTIEQSINVKPLDLNRTADVHTLLYEARRMG |

|                 |      |                                                                |
|-----------------|------|----------------------------------------------------------------|
| KH105_crtIBY1   | 1187 | ---ALFKMVPALVVTIMRFG-----                                      |
| KH105_crtIBY2   | 1187 | ---ALFKMVPALVVTIMRFG-----                                      |
| Brevundimonas   | 333  | --AARPDQRYRVLERFYRLP-----                                      |
| Xanthophyllomyc | 518  | TALQLVNIARDIKGDATEGRFYVPLPSFFGLRDESKLAIPTDWTEPRPQDFDKLLSLSPSS  |
| Arabidopsis     | 294  | LLKLDLDATRRFFDAFFDLQPHYWHGFLSSRLFLP-----                       |
| Haematococcus   | 461  | LLSLDLQOTRDFFSAFFNLSDFHWHGFLSTRLSFS-----                       |
| Thalassiosira   | 463  | LMKQNVVGLRGFFDGGFFKLPLGLWGGFLAGWPGLPNN-----                    |
| Ectocarpus      | 402  | LMAQPASTLRGFFNGFFKLPLPLWAGFLSGYPNLPHN-----                     |
| Chlamydomonas   | 448  | LLKLNLPQIREFFRAFFSLSDFHWHGFLSTRLSLP-----                       |
| Synechococcus   | 345  | LMGFNEALLRTHFATFFSLPREEWFGFLTNTLPLP-----                       |
| Haloquadratum   | 250  | -----EWS-----                                                  |
| Natrinema       |      | -----                                                          |
| Phycomyces      | 458  | LALQLTNIARDIVTDSKQIG-----RSYVFRDWLTSQ-----ESALLK-----          |
| Sporisorium     | 539  | VSLLQLVNIARDIVPDSVELR-----RCYLETDMFDKQ--DARMQDALLAGHIAVR---SQH |
| Ustilago        | 540  | VSLLQLVNIARDVVPDSVELR-----RCYLPA DMFDKEEDDGMYEALLKGRVALPRHASKL |

|                 |      |                                                               |
|-----------------|------|---------------------------------------------------------------|
| KH105_crtIBY1   | 1204 | -----FWACALMAGVHLPARGRVLFVAAAVVAISCAPA                        |
| KH105_crtIBY2   | 1204 | -----FWACALMAGVHLPARGRVLFVAAAVVAISCAPA                        |
| Brevundimonas   | 351  | -----QPLIERFYAGETTLADKARILSGKPPVPIGAALT                       |
| Xanthophyllomyc | 578  | TLPSSNASESFRFEWKTYSLEPLVAYAEDLAKHSYKIDRLP--TEVQAGMRAACASYLLIG |
| Arabidopsis     | 329  | -----ELLVFGLSLFSHASNTSRLEIMTKGTVPPLAK--MIN                    |
| Haematococcus   | 496  | -----QLLGFGITLFFKSSNNIRIHLKLGLVPGLVR--ILF                     |
| Thalassiosira   | 500  | -----ENHETWWARLVFGLTFVSKLP--VSVAVDMLGSIATYS--IS               |
| Ectocarpus      | 439  | -----ELHQDWQSRFKFGLOFFFKLAPAVQFQALALAGALSGWQVGLIK             |
| Chlamydomonas   | 483  | -----QLIVEGLTLFWKSSNOARASLLQIGIPGLVV--MLS                     |
| Synechococcus   | 380  | -----RLMGVMLRLFALSPWELRRGLVLGAAMDQLP-----                     |
| Haloquadratum   | 253  | -----YLLIG                                                    |
| Natrinema       |      | -----                                                         |
| Phycomyces      | 496  | ---AGKARELGDERLRQIALKMVYTADDLNLMASRAIDYLP--PSSRCGVRAACNVYTAIG |
| Sporisorium     | 590  | TTTLEEKELVQPRDVRKYALRLLRVSRGLYDQAYPALAQIPNRPARAGLKAACS VYAAIG |
| Ustilago        | 595  | VHGAEEQGVVRPQDVRKYALRLLEISQRLYDESYPSLRQIPNRPARAGLKAACS VYAAIG |

|                 |      |                                                               |
|-----------------|------|---------------------------------------------------------------|
| KH105_crtIBY1   | 1236 | ALAPLLAGTVLVGTLGGWHTRDRDDTLPLYKNA-----                        |
| KH105_crtIBY2   | 1236 | ALAPLLAGTVLVGTLGGWHTRDREDTLPLYKNA-----                        |
| Brevundimonas   | 385  | CLVERGRA-----                                                 |
| Xanthophyllomyc | 637  | REIKVVW---KGDVGERTVAGWRRVRKVLSVVMSCWEGQ-----                  |
| Arabidopsis     | 363  | NLVQDRD-----                                                  |
| Haematococcus   | 530  | MLAPTIRG--YYKHAPTVRQOKAVADAAAAVAARTA--AAAKPADLPPAMIK-----     |
| Thalassiosira   | 538  | EGVPLP--QSVTPLGLPDGYEYREKKSSIGDVAAKHEARRMIMESTVEEVVPVDFEET    |
| Ectocarpus      | 482  | AVTPLAEEEEAKDLLFDAEVDAIRAAAKAKGDAASGASAE---GSPVADGKKKKEEKERA  |
| Chlamydomonas   | 517  | GLAPTILGGGYYPDTMSLKERKDAVDAAARSAAAAARAAADVASDAAAFVSANSSGADMAV |
| Synechococcus   | 411  | TFDQSSG-----                                                  |
| Haloquadratum   | 258  | REIKVVW---KGDVGERTVAGWRRVRKVLSVVMSCWEGQ-----                  |
| Natrinema       |      | -----                                                         |
| Phycomyces      | 552  | VSLHKANGYPDRAHLTKLERMKVTFRCVYGFRKGHGVOGDRGKSQAFTVI-----       |
| Sporisorium     | 650  | TRIEAQT--ETDVAEGRRRARMNSNRDRMLRAVSAVYFGV-----                 |
| Ustilago        | 655  | KRIQAQT--EDEISSGRRRARMNSNLDRIILRAISAVYFDV-----                |

|                 |     |                |
|-----------------|-----|----------------|
| KH105_crtIBY1   |     | -----          |
| KH105_crtIBY2   |     | -----          |
| Brevundimonas   |     | -----          |
| Xanthophyllomyc |     | -----          |
| Arabidopsis     |     | -----          |
| Haematococcus   |     | -----          |
| Thalassiosira   | 596 | AA-----        |
| Ectocarpus      | 538 | LAA-----       |
| Chlamydomonas   | 577 | VEVVEKAFSTSNTK |
| Synechococcus   |     | -----          |
| Haloquadratum   |     | -----          |
| Natrinema       |     | -----          |
| Phycomyces      |     | -----          |
| Sporisorium     |     | -----          |
| Ustilago        |     | -----          |
