# Supplementary material for: A Possible Trifunctional β-Carotene Synthase Gene Identified in the Draft Genome of Aurantiochytrium sp. Strain KH105
Source: MDPI journal article supplement (doi:10.3390/genes9040200), 2018-04-09
Supplement: s1 [file s1]

Supplementary Table S2: RNA-seq data summary for differential gene expression profile analyses

| Sample | #Sequences | Total Bases (Gb) | #Assembled Transcripts |
|--------|------------|------------------|------------------------|
| A_Ia   | 28,157,058 | 8.45             | 82,160                 |
| A_Ib   | 27,715,229 | 8.31             | 112,852                |
| A_Ic   | 19,557,035 | 5.87             | 64,365                 |
| A_IIa  | 25,171,065 | 7.55             | 114,682                |
| A_IIb  | 27,209,859 | 8.16             | 109,189                |
| A_IIc  | 26,404,861 | 7.92             | 109,917                |
| A_IIIa | 40,394,441 | 12.12            | 101,052                |
| A_IIIb | 24,777,602 | 7.43             | 100,636                |
| A_IIIc | 33,084,528 | 9.93             | 118,491                |
| B_a    | 36,097,955 | 10.83            | 79,447                 |
| B_b    | 32,924,373 | 9.88             | 74,319                 |
| B_c    | 31,840,576 | 9.55             | 78,507                 |
