# Supplementary figures and images for: A Possible Trifunctional β-Carotene Synthase Gene Identified in the Draft Genome of Aurantiochytrium sp. Strain KH105
Source: MDPI journal article supplement (doi:10.3390/genes9040200), 2018-04-09

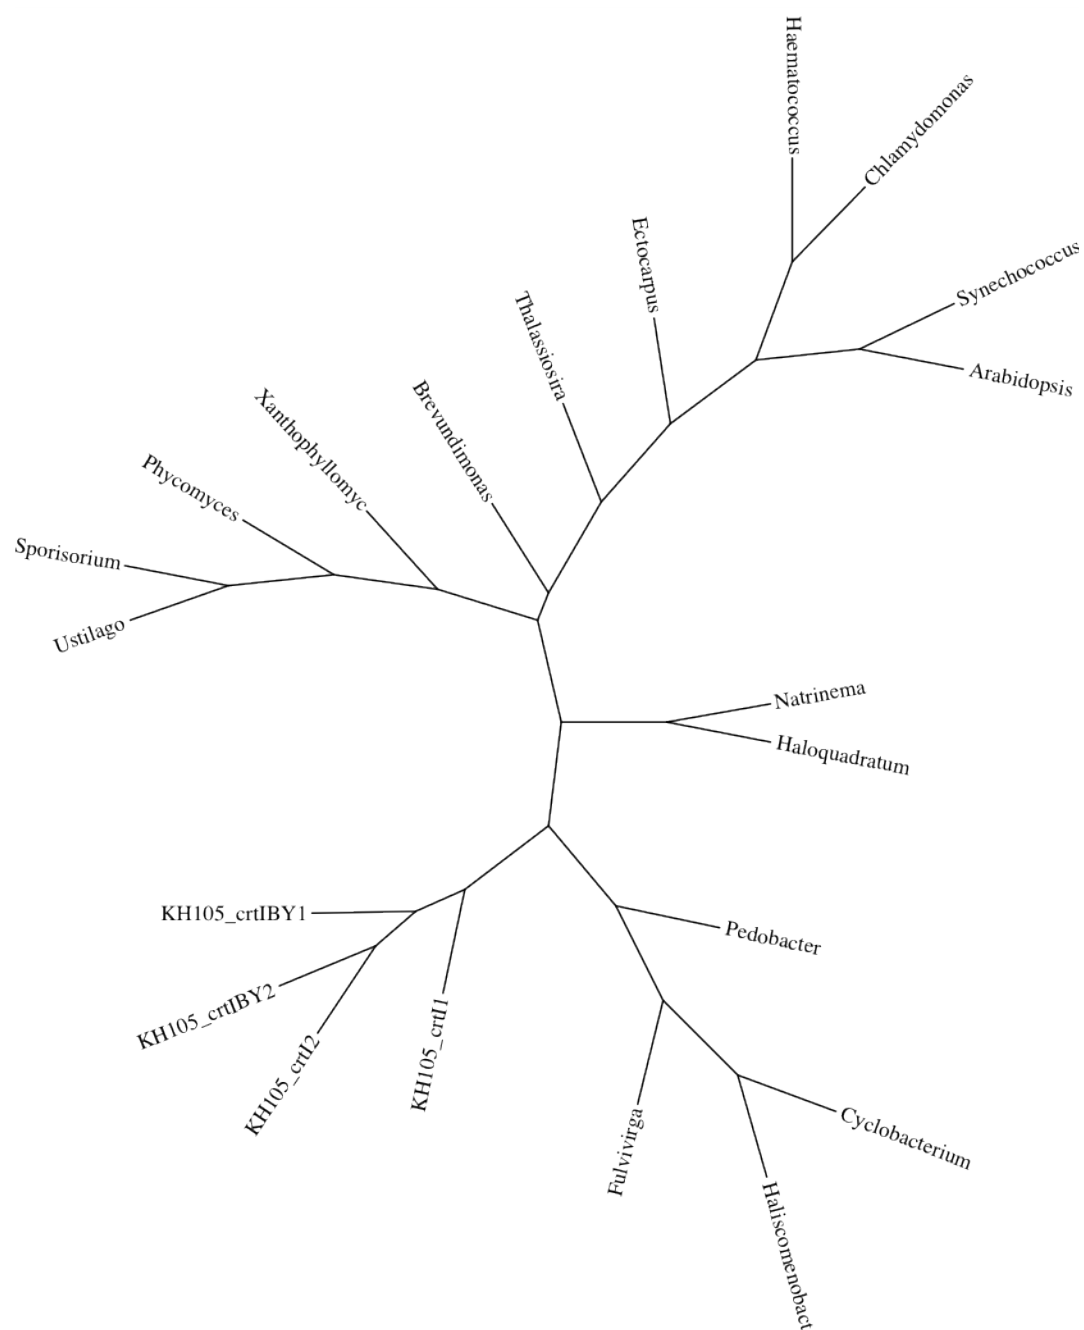

**Supplementary Figure S4:** Molecular phylogeny of KH105\_CrtIBY1, CrtIBY2, CrtI1 and CrtI2 by MP method.

Supplement: s1 [file s1]

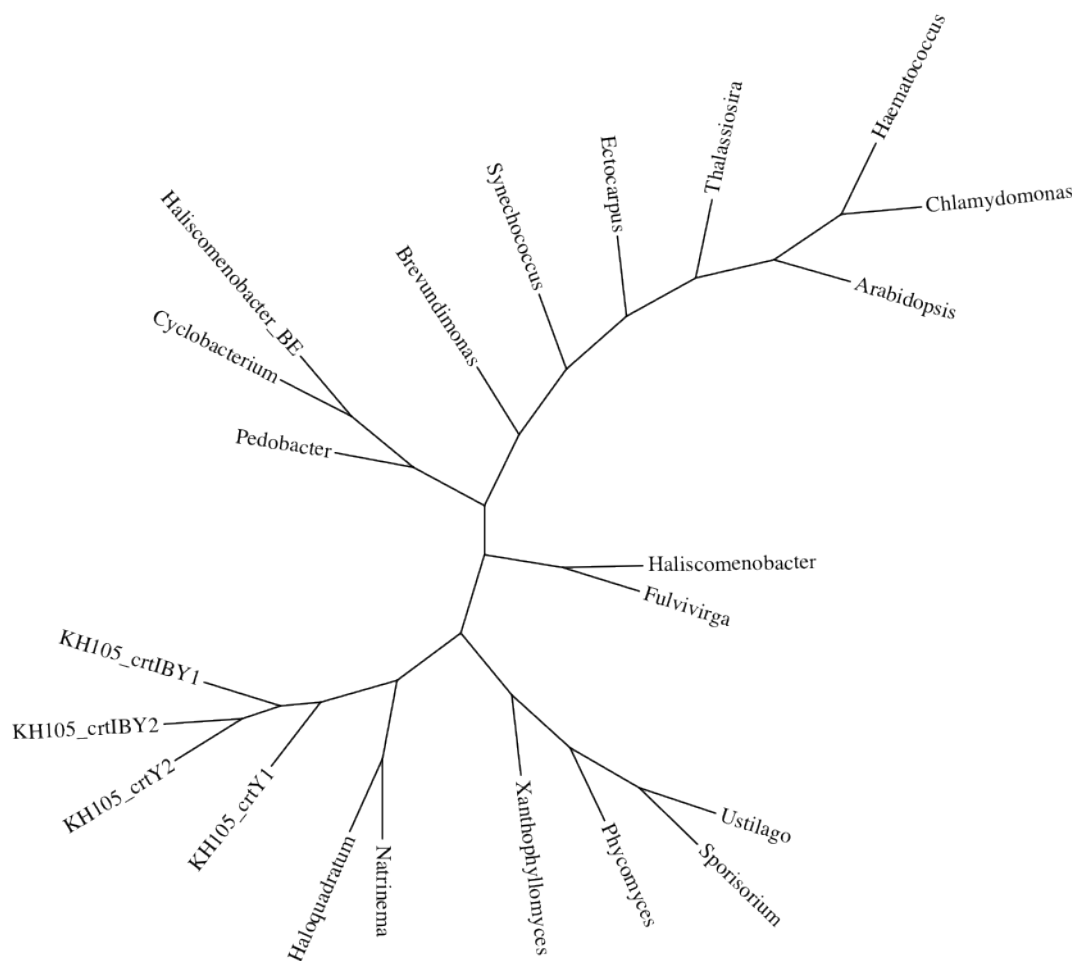

**Supplementary Figure S8:** Molecular phylogeny of KH105\_CrtIBY1, CrtIBY2, CrtB1 and CrtB2 by MP method.

Supplement: s1 [file s1]

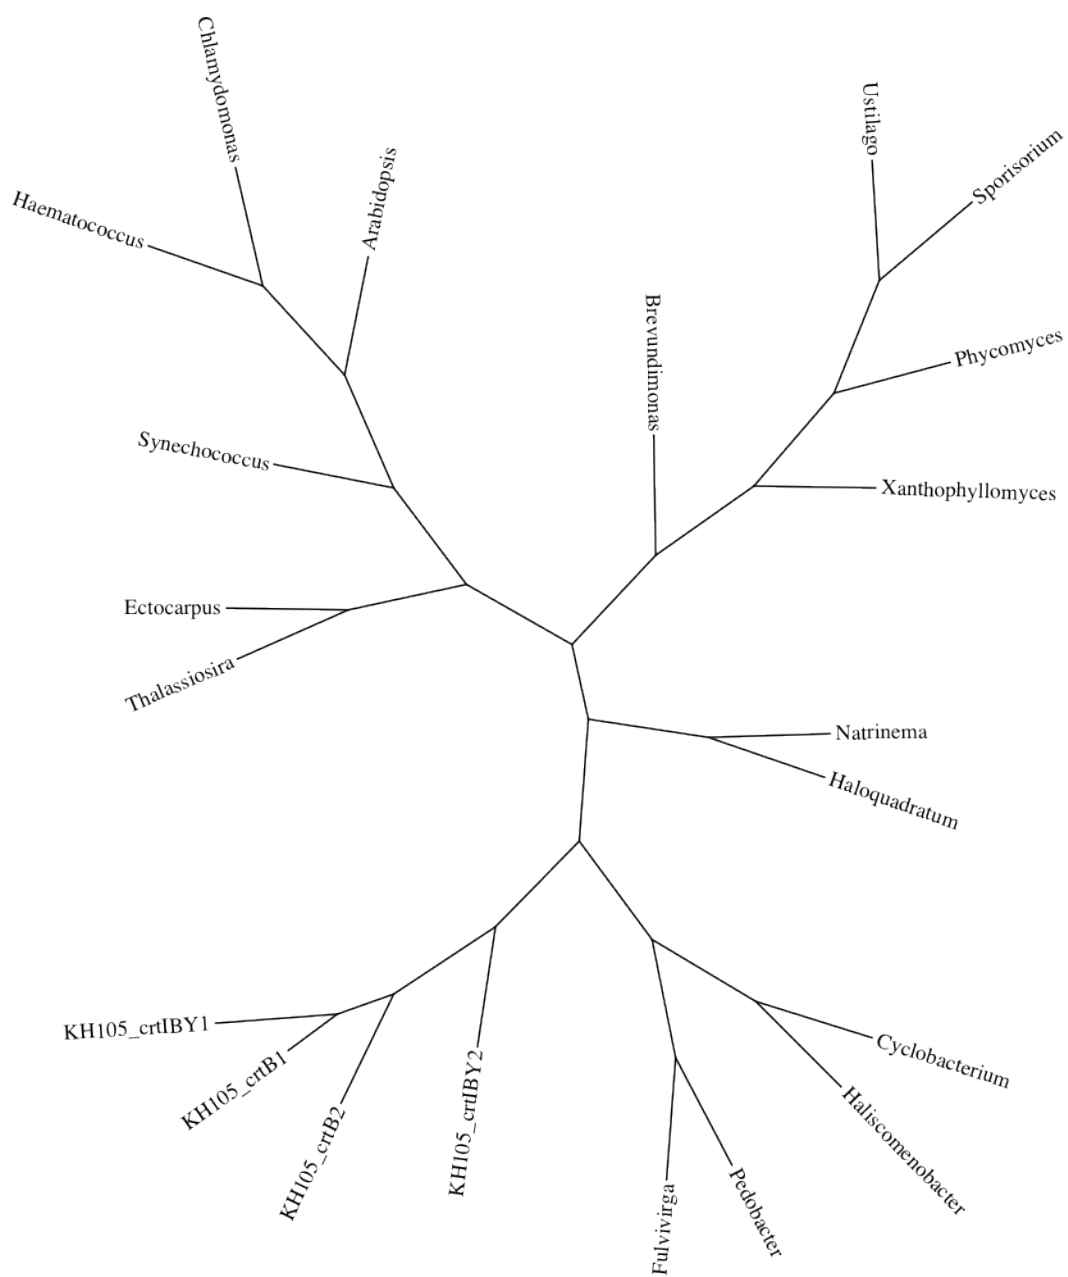

**Supplementary Figure S6:** Molecular phylogeny of KH105\_CrtI BY1, CrtI BY2, CrtB1 and CrtB2 by MP method.

Supplement: s1 [file s1]
